# Supplementary material for: Ultra-Efficient and Cost-Effective Platinum Nanomembrane Electrocatalyst for Sustainable Hydrogen Production
Source: PubMed Central journal article supplement (PMC10844191; doi:10.1007/s40820-024-01324-5), 2024-02-05
Supplement: 40820_2024_1324_MOESM1_ESM.pdf [file 40820_2024_1324_MOESM1_ESM.pdf]

Supporting Information for

**Ultra-Efficient and Cost-Effective Platinum Nanomembrane Electrocatalyst for Sustainable Hydrogen Production**Xiang Gao<sup>1, †</sup>, Shicheng Dai<sup>1,2,3, †</sup>, Yun Teng<sup>1, †</sup>, Qing Wang<sup>4</sup>, Zhibo Zhang<sup>1</sup>, Ziyin Yang<sup>1</sup>, Minhyuk Park<sup>1</sup>, Hang Wang<sup>1</sup>, Zhe Jia<sup>5</sup>, Yunjiang Wang<sup>2,3</sup>, Yong Yang<sup>1,6,\*</sup><sup>1</sup> Department of Mechanical Engineering, College of Engineering, City University of Hong Kong, Tat Chee Avenue, Kowloon Tong, Kowloon, Hong Kong, P. R. China<sup>2</sup> State Key Laboratory of Nonlinear Mechanics, Institute of Mechanics, Chinese Academy of Sciences, Beijing, P. R. China<sup>3</sup> School of Engineering Science, University of Chinese Academy of Sciences, Beijing, P. R. China<sup>4</sup> Laboratory for Microstructures, Institute of Materials, Shanghai University, Shanghai, P. R. China<sup>5</sup> School of Materials Science and Engineering, Jiangsu Key Laboratory for Advanced Metallic Materials, Southeast University, Nanjing, P. R. China<sup>6</sup> Department of Materials Science and Engineering, College of Engineering, City University of Hong Kong, Tat Chee Avenue, Kowloon Tong, Kowloon, Hong Kong, P. R. China

† Xiang Gao, Shicheng Dai and Yun Teng contributed equally to this work.

\*Corresponding author. E-mail: [yonyang@cityu.edu.hk](mailto:yonyang@cityu.edu.hk) (Yong Yang)**Supplementary Figures and Tables**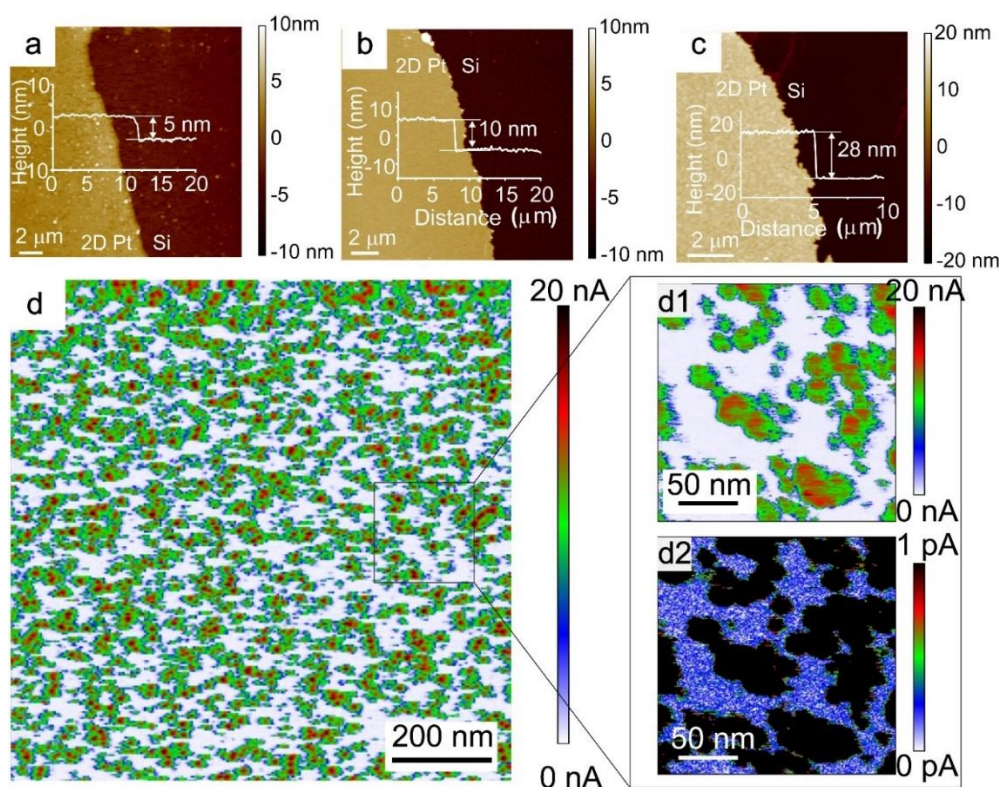

**Fig. S1** Atomic Force Microscope (AFM) thickness measurement of (a) 5 nm, (b) 10 nm, (c) 28 nm. (d) Conductive atomic force microscopy (C-AFM) mapping image of 19 nm nanomembrane, inset figures show the enlarged views with different scale bars

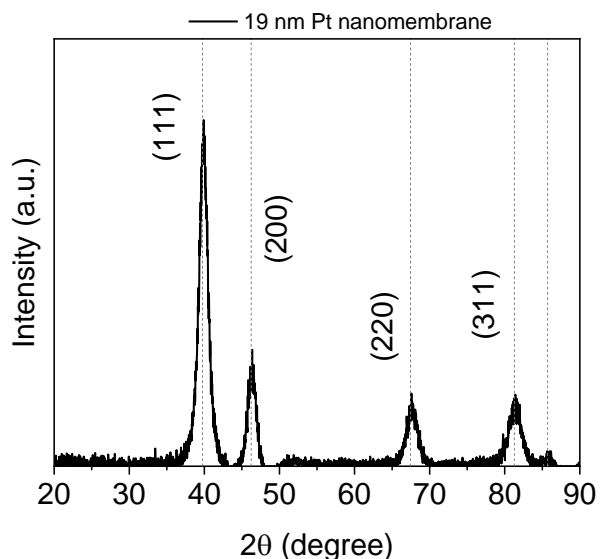

**Fig. S2** X-ray diffraction pattern of 19 nm Pt nanomembrane

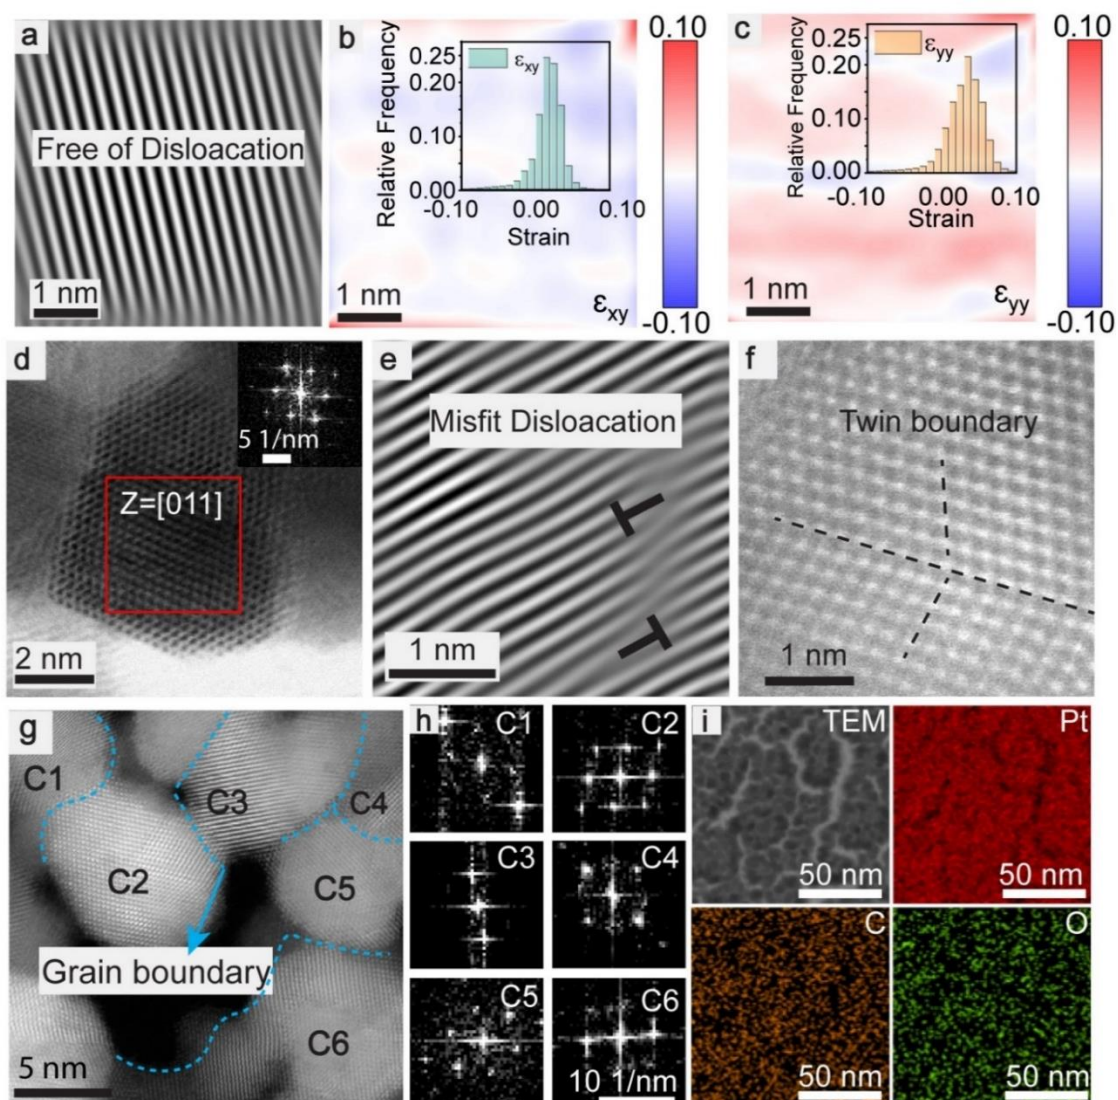

**Fig. S3** Transmission electron microscope (TEM) analysis of 19 nm Pt nanomembranes. (a) The filtered IFFT image of Fig. 1g, showing a defect-free region. (b) Contour map of the normal strain  $\epsilon_{xy}$  in Fig. 1g, inset is the distribution of the strain  $\epsilon_{xy}$  component. (c) Contour map of the

normal strain  $\epsilon_{yy}$  in Fig. 1g, inset is the distribution of the strain  $\epsilon_{yy}$  component. (d) High-angle annular dark-field scanning transmission electron microscopy (HAADF-STEM) images from the [011] direction of a typical Pt nanocrystal (NC) with a FCC structure. (e) The filtered IFFT image of the region in Fig. S2d. (f) twin boundary. (g) Representative high-resolution STEM images of the Pt nanomembranes, the dashed line points out the grain boundaries. (h) The corresponding FFT images are obtained from the grains in Fig. S2g. (i) TEM image of Pt nanomembrane and corresponding elements maps of Pt, C, and O

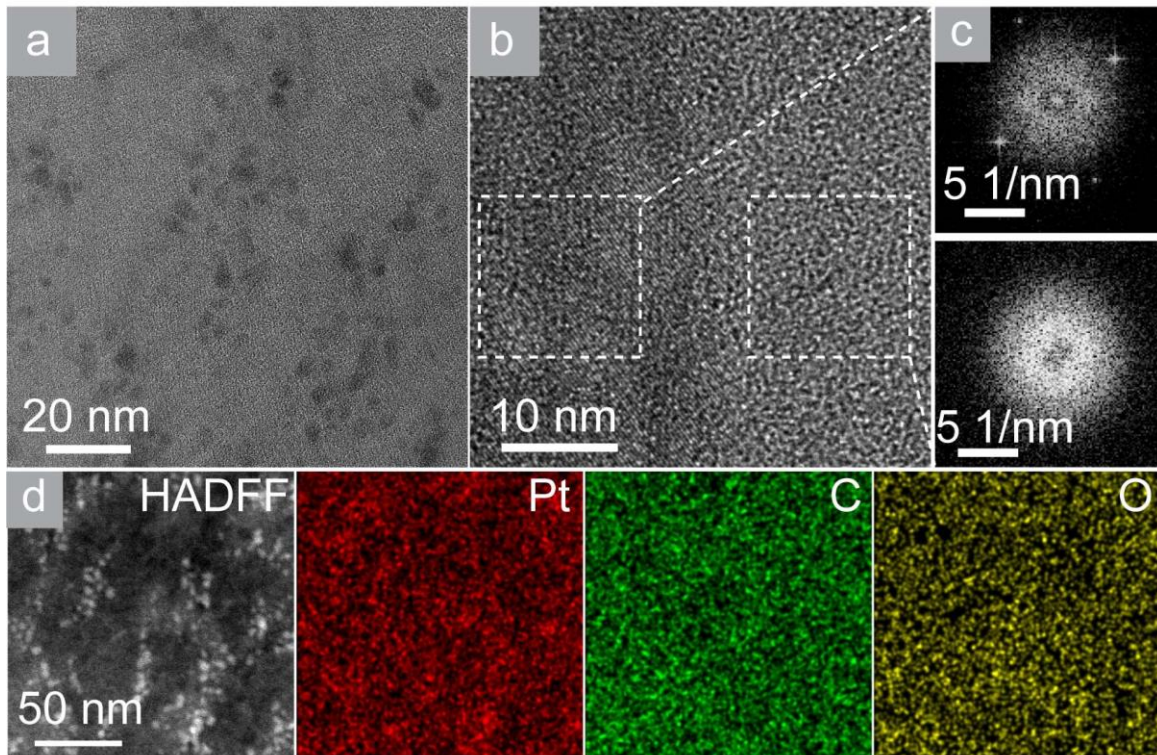

**Fig. S4** TEM analysis of 5 nm Pt nanomembrane. (a) Low magnification of TEM image. (b) Enlarged TEM image, showing Pt nanoparticle and amorphous carbon. (c) The corresponding FFT images of (b). (d) HAADF-STEM image and corresponding elements maps of Pt, C and O

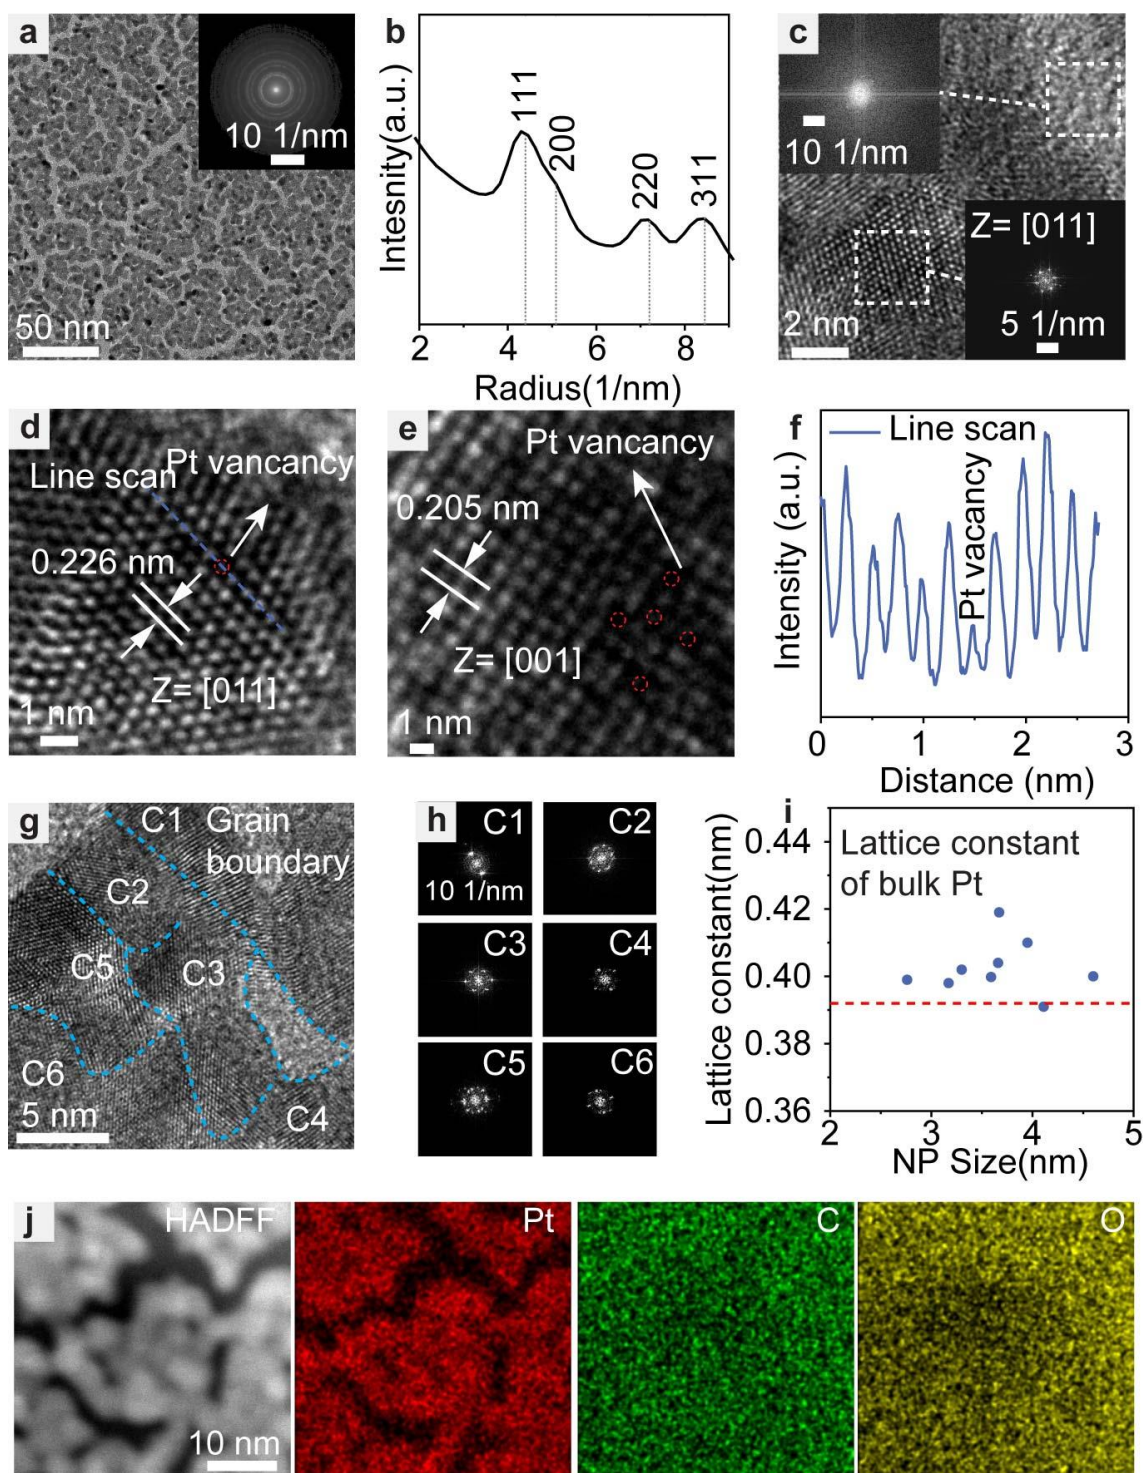

**Fig. S5** TEM analysis of 10 nm Pt nanomembrane. (a) Low-magnification of TEM image, inset shows the corresponding SADP. (b) Radially integrated intensity of the diffraction patterns of the freestanding nanomembrane, in comparison with those of the single-phase FCC bulk Pt as indicated by the dash lines. (c) The high resolution TEM image of the 10 nm thick Pt nanomembrane. Insets are Fast Fourier transform (FFT) patterns of the amorphous (upper left) and crystalline (lower right) regions. (d, e) High resolution TEM images, showing the defects of vacancy in the orientation of [011] and [001] respectively. (f) Line scan of Intensity, showing the location of Pt vacancy. (g) Representative high-resolution TEM images of the Pt NC, the dashed line points out the grain boundaries. (h) The corresponding FFT images are obtained from the grains in Fig. S3g. (i) Lattice constant with the size of Pt nanocrystal (NC). (j) HAADF-STEM image and corresponding elements maps of Pt, C and O

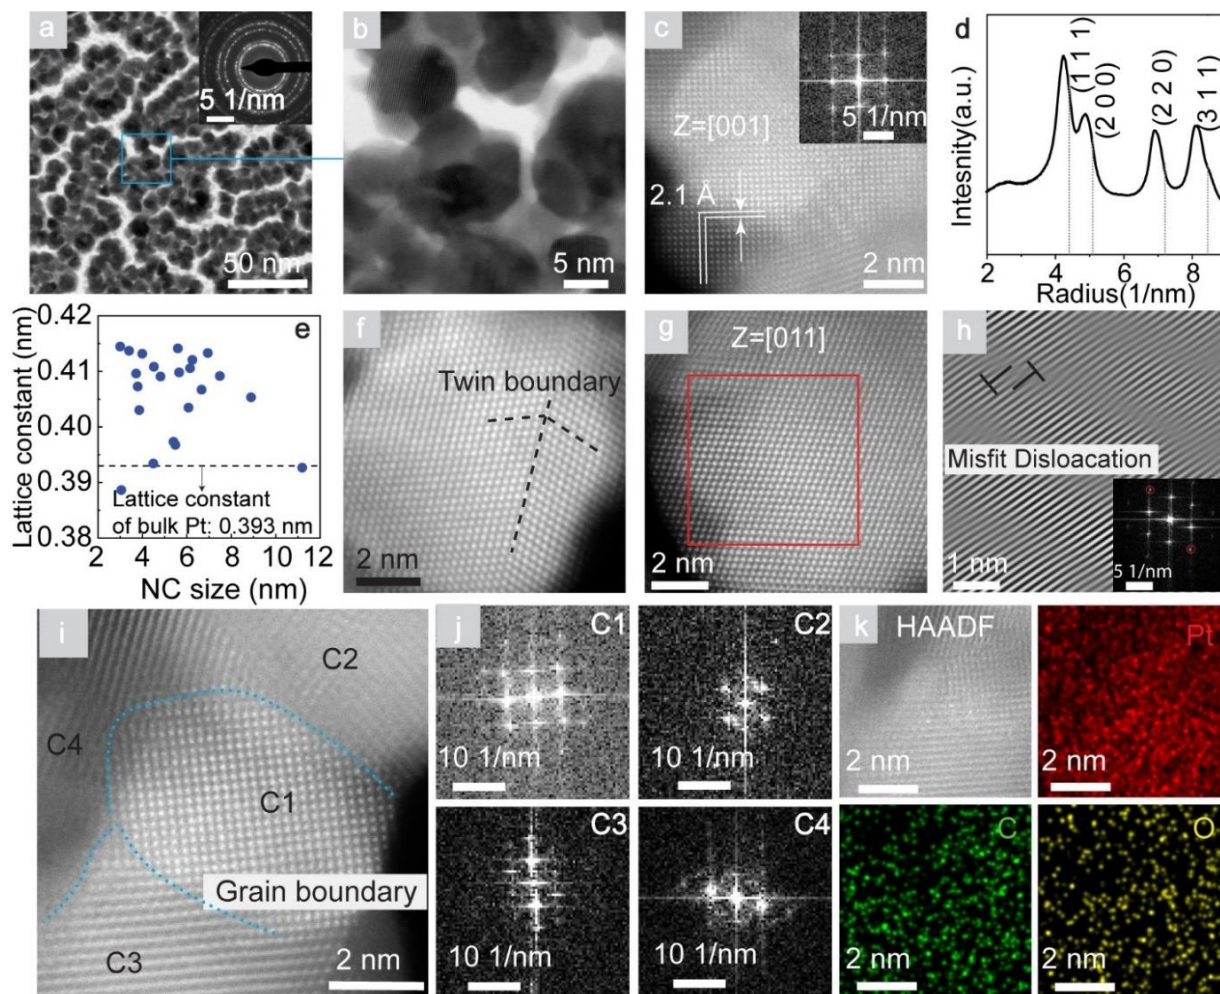

**Fig. S6** TEM analysis of 28 nm Pt nanomembrane. **(a)** Low-magnification of HAADF-STEM image, inset is the corresponding SADP. **(b)** High magnification HAADF-STEM image of the 28 nm-thick freestanding Pt nanomembrane. **(c)** HAADF-STEM images from the [001] direction of a typical platinum NC with the FCC structure. **(d)** Radially integrated intensity of the diffraction patterns of the freestanding nanomembrane, in comparison with those of the single-phase FCC bulk Pt as indicated by the dash lines. **(e)** Lattice constant with the size of Pt NC. **(f)** Twin boundary. **(g)** HAADF-STEM images from the [011] direction of a typical Pt NC with a FCC structure. **(h)** The filtered IFFT image of the region in Fig. S4g, indicating misfit dislocation. **(i)** Representative high-resolution STEM images of the Pt NC, the dashed line points out the grain boundaries. **(j)** The corresponding FFT images are obtained from the grains in Fig. S4i. **(k)** HAADF-STEM image and corresponding elements maps of Pt, C and O

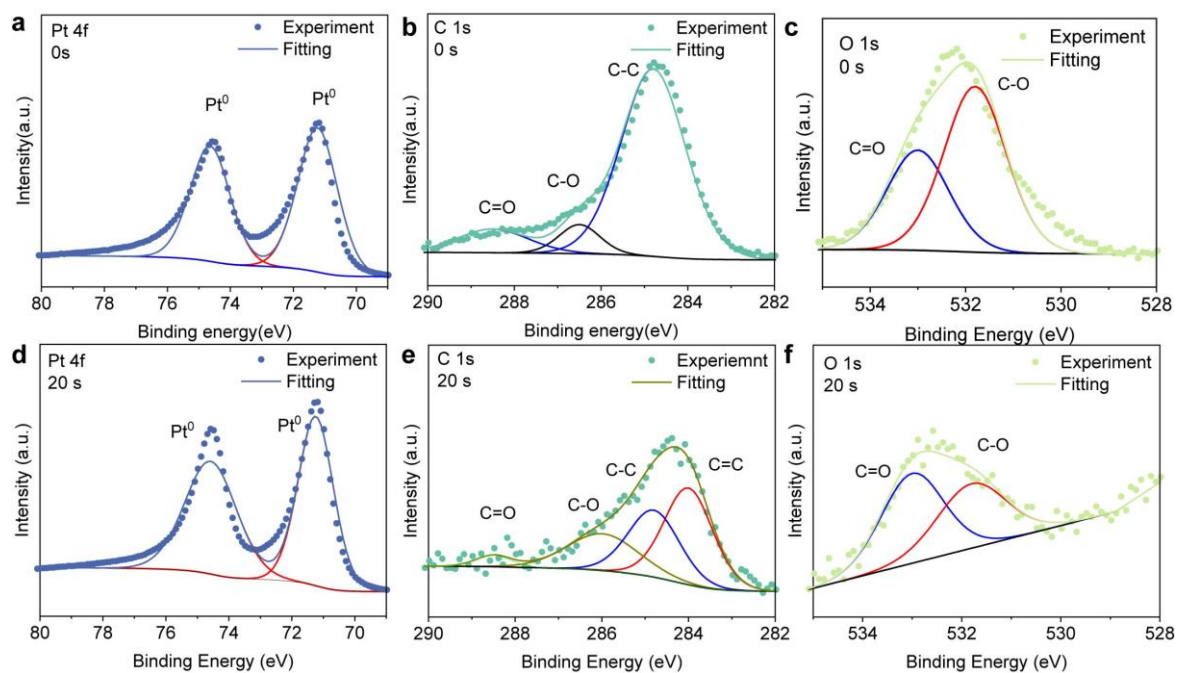

**Fig. S7** X-ray photoelectron spectroscopy (XPS) narrow scanning with curve fitting based on the peaks of the constituent elements in the 19 nm Pt Nanomembrane. (a-c) were obtained at 0 s etching, (d-f) were obtained at 20 s etching

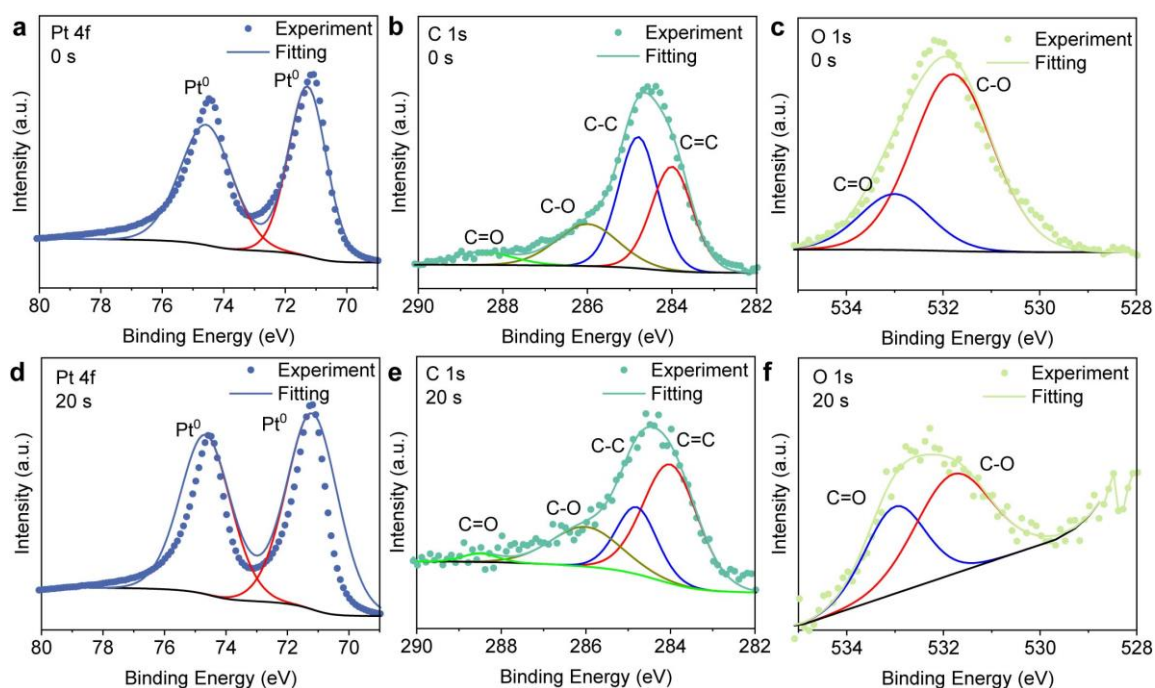

**Fig. S8** X-ray photoelectron spectroscopy (XPS) narrow scanning with curve fitting based on the peaks of the constituent elements in the 28 nm Pt Nanomembrane. (a-c) were obtained at 0 s etching, (d-f) were obtained at 20 s etching

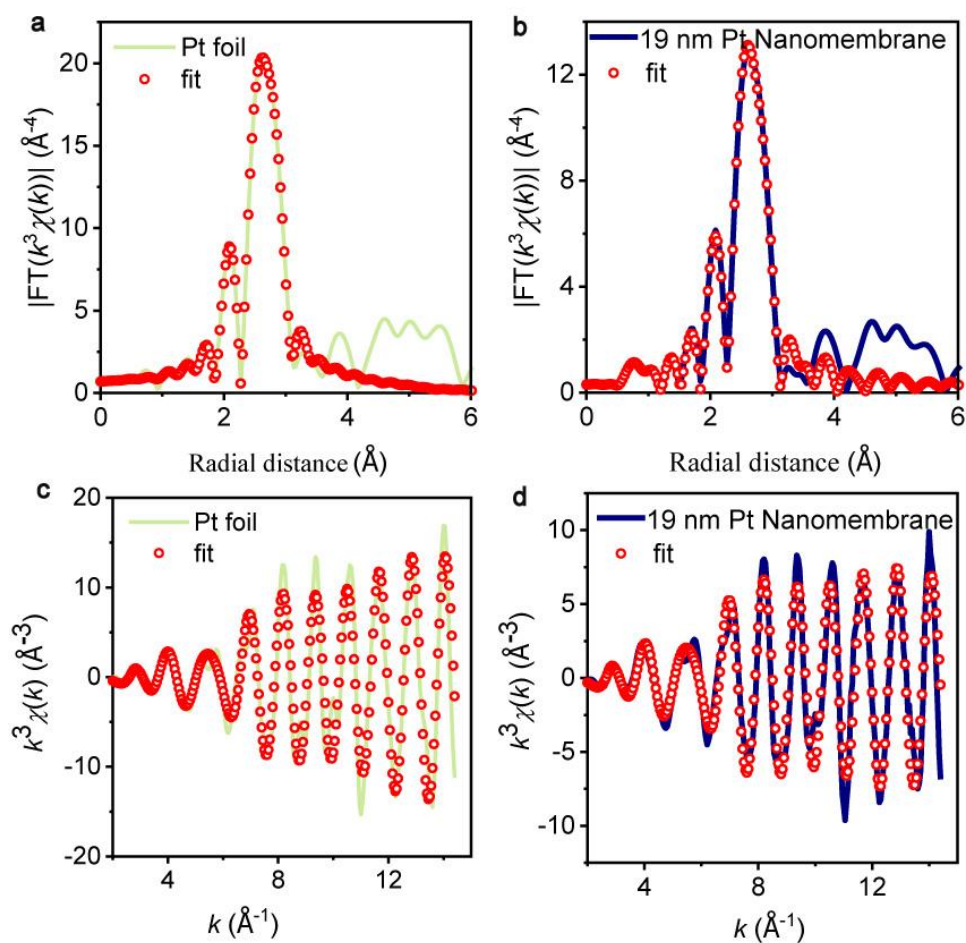

**Fig. S9** EXAFS fitting results of Pt foil and 19 nm Pt nanomembrane. (a)-(b), FT-EXAFS spectra in r-space and the corresponding least-squares fit for the first shell of Pt foil and 19 nm Pt nanomembrane. (c)-(d), EXAFS  $\chi(k)$  signals in k-space and the corresponding least-squares fit for Pt foil and 19 nm Pt nanomembrane

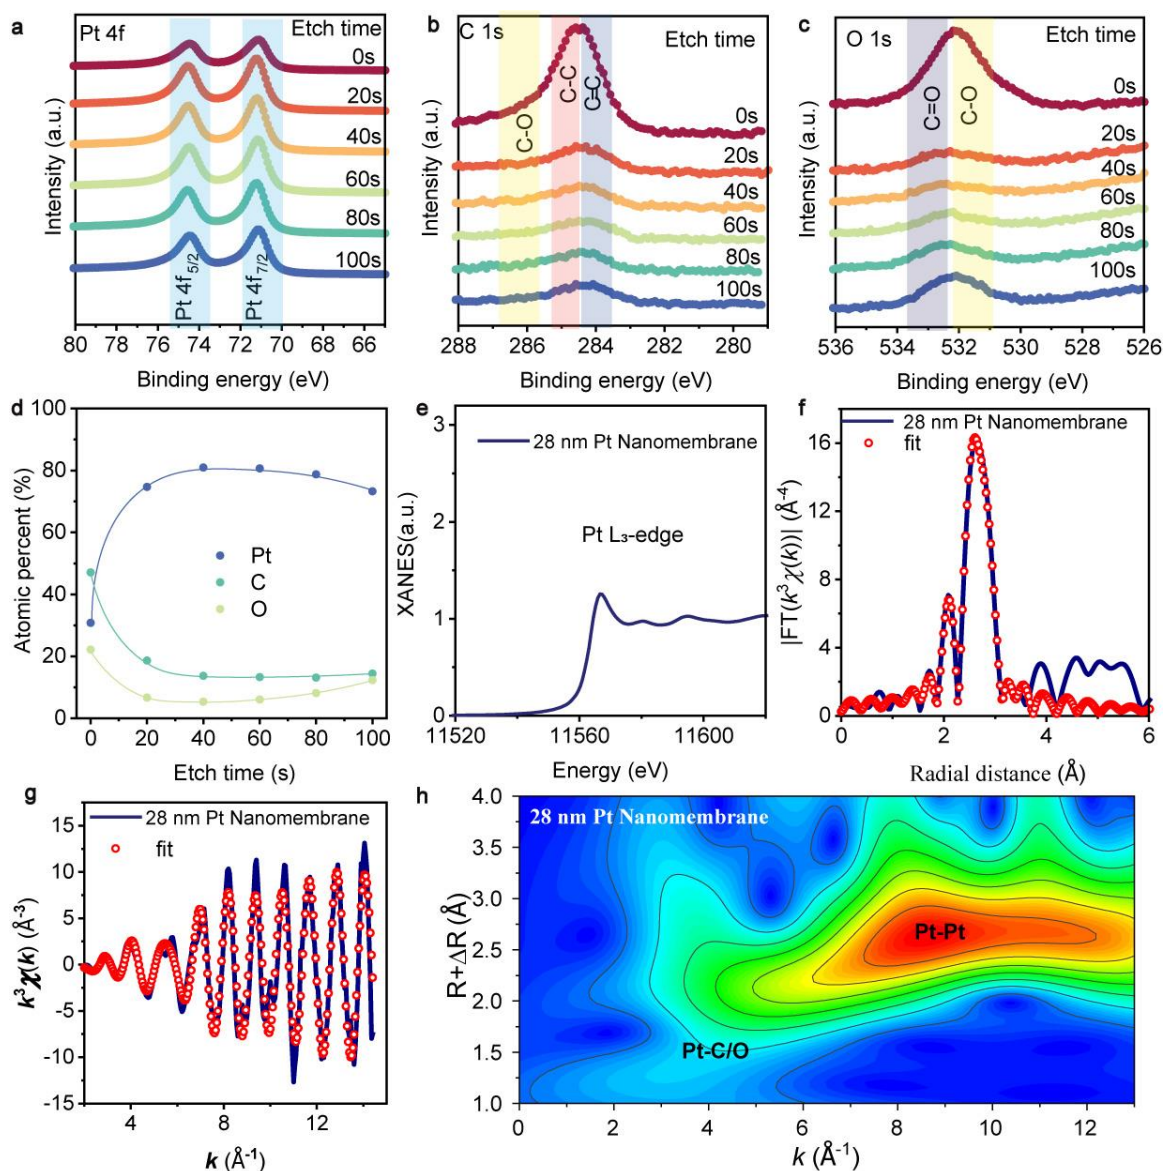

**Fig. S10** Chemical bonding and atomic packing analyses of a 28 nm thick Pt nanomembrane. (a–c) Narrow-scan X-ray photoelectron spectroscopy (XPS) spectra for (a) Pt 4f, (b) C 1s, and (c) O 1s with the etching time. (d) Relative atomic concentration of Pt, C, and O with depth, as obtained from the quantitative analysis of the XPS data. (e) X-ray absorption near edge structure (XANES) at Pt L<sub>3</sub> edge. (f) FT-EXAFS region for the local structure of Pt and the corresponding least-squares fit for the first shell. (g) EXAFS  $\chi(k)$  signals in  $k$ -space and the corresponding least-squares fit. (h) shows the wavelet transform for the  $k^3$ -weighted EXAFS Pt K-edge signal of 28 nm Pt nanomembrane



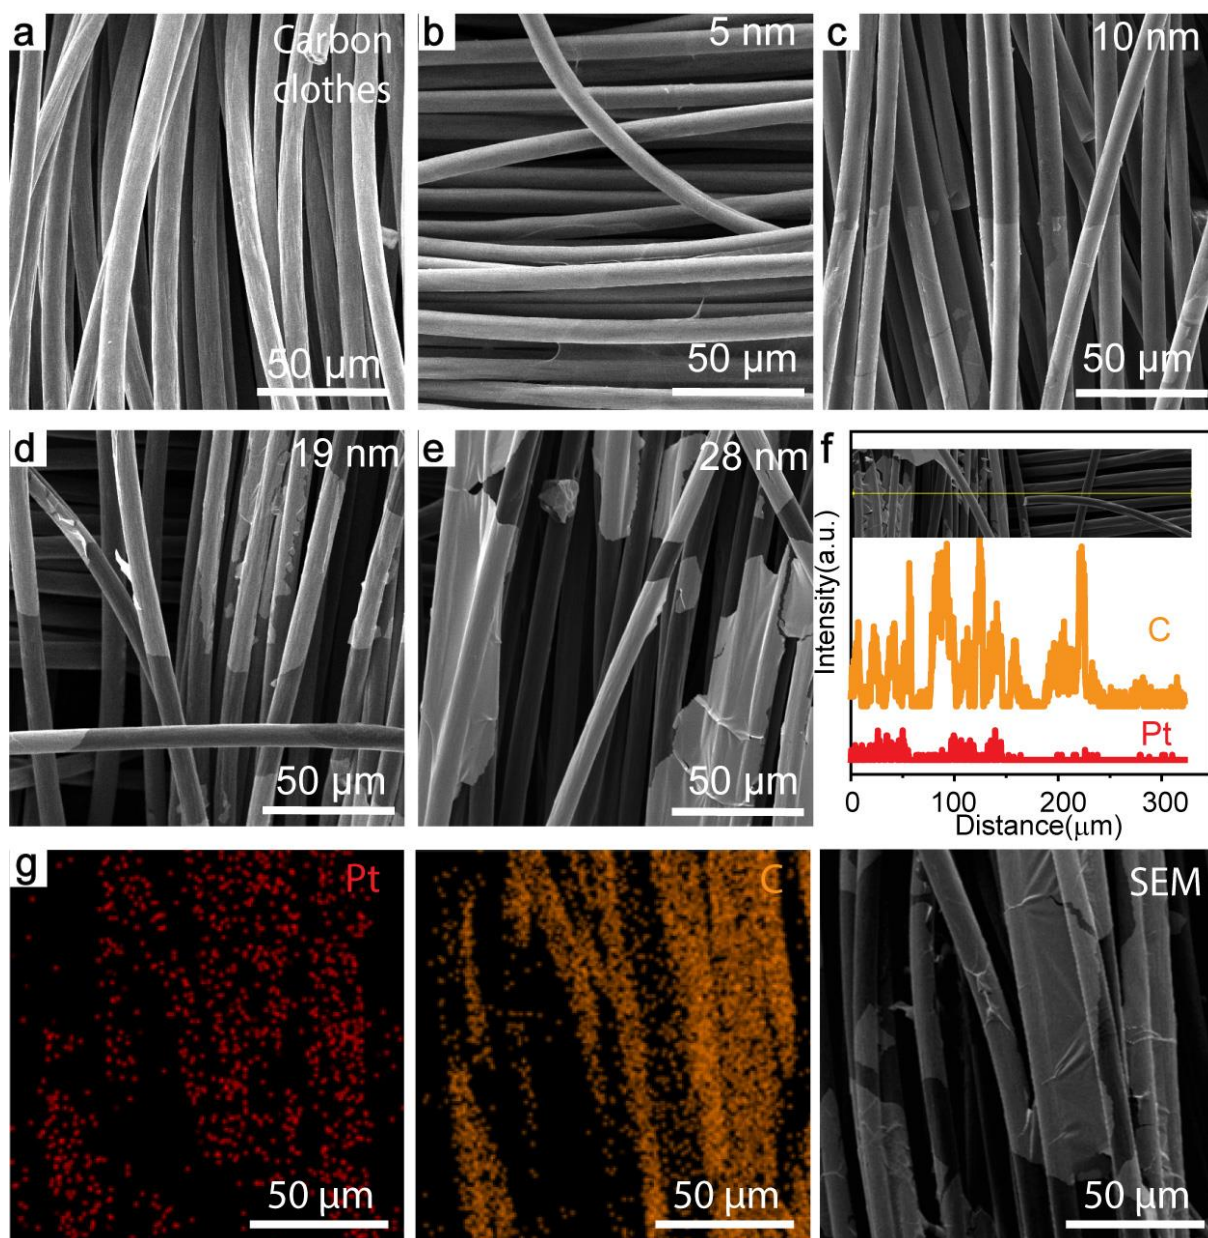

**Fig. S11** Morphology and composition of the freestanding Pt nanomembrane transferred to the carbon clothes. (a) Scanning Electron Microscopy (SEM) image of Pure carbon clothes without Pt nanomembrane. (b-e) SEM images of 5 nm, 10 nm, 19 nm and 28 nm Pt nanomembrane transferred to carbon clothes. (f) Line scan of carbon clothes with 19 nm nanomembrane. (g) Energy Dispersive Spectroscopy (EDS) mapping of carbon clothes with 19 nm nanomembrane

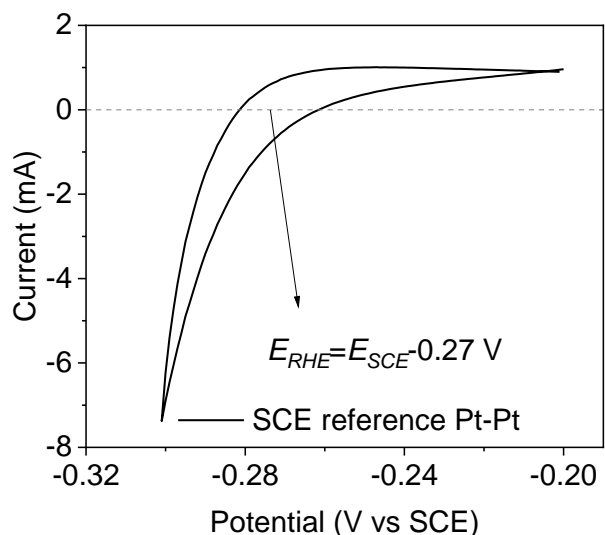

**Fig. S12** Calibration of the saturated calomel electrode in 0.5 M H<sub>2</sub>SO<sub>4</sub> with an H<sub>2</sub> atmosphere

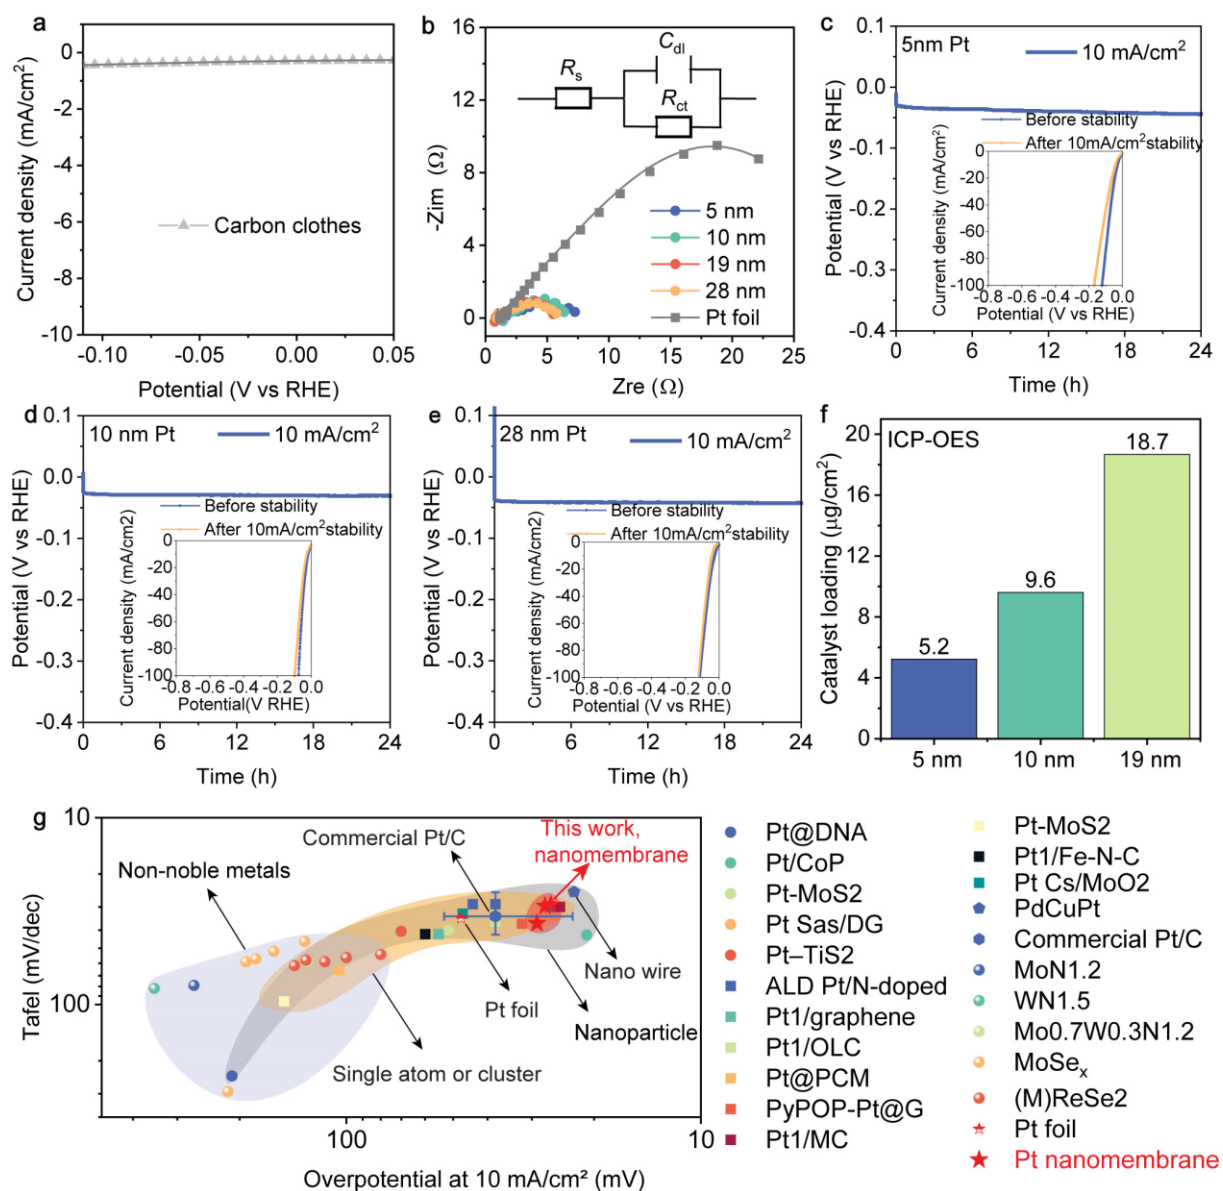

**Fig. S13** (a) Linear Sweep Voltammetry (LSV) curve of Pure carbon clothes. (b) Electrochemical Impedance Spectrum (EIS) results of Pt nanomembrane and Pt foil at constant

potential  $-0.01$  V vs RHE. (c)-(e) Stability tests of 5 nm, 10 nm and 28 nm Pt nanomembrane at  $10 \text{ mA/cm}^2$  current density respectively, insets show LSV before and after stability tests. (f) Pt loading of our nanomembrane with different thicknesses measured by Inductively Coupled Plasma Optical Emission spectroscopy (ICP-OES). (g) Comparison of overpotential at  $10 \text{ mA/cm}^2$  and Tafel slope with many other recently reported HER electrocatalysts, data from Table S2

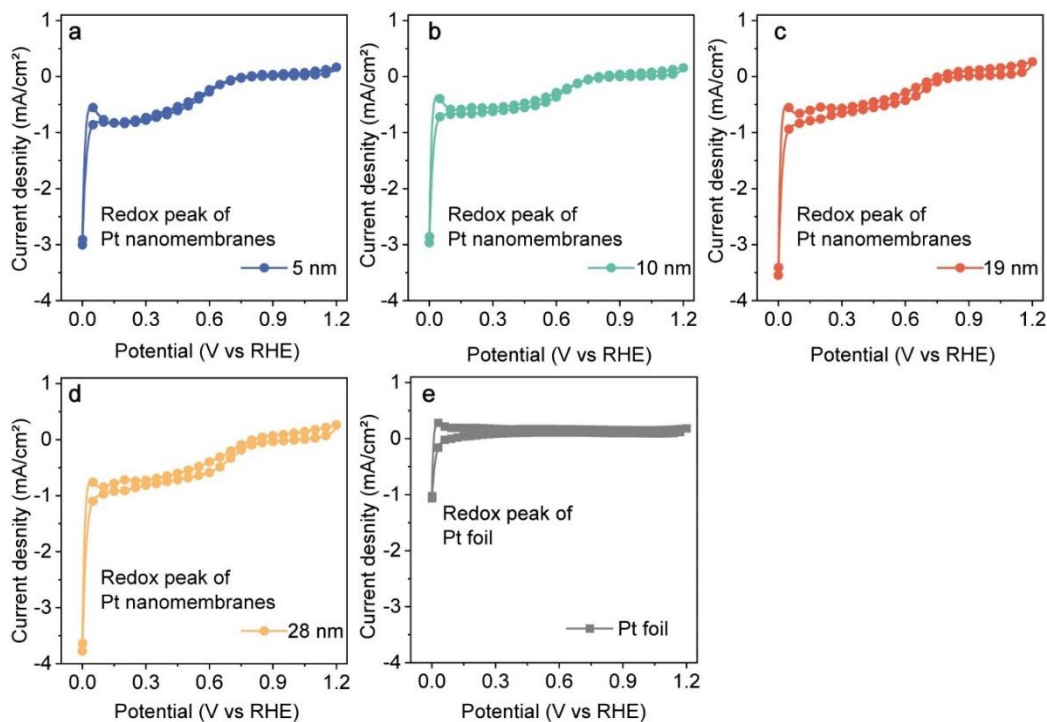

**Fig. S14** Cyclic Voltammetry (CV) curves of (a) 5 nm, (b) 10 nm, (c) 19 nm, (d) 28 nm and (e) Pt foil at a scan rate of  $50 \text{ mV/s}$

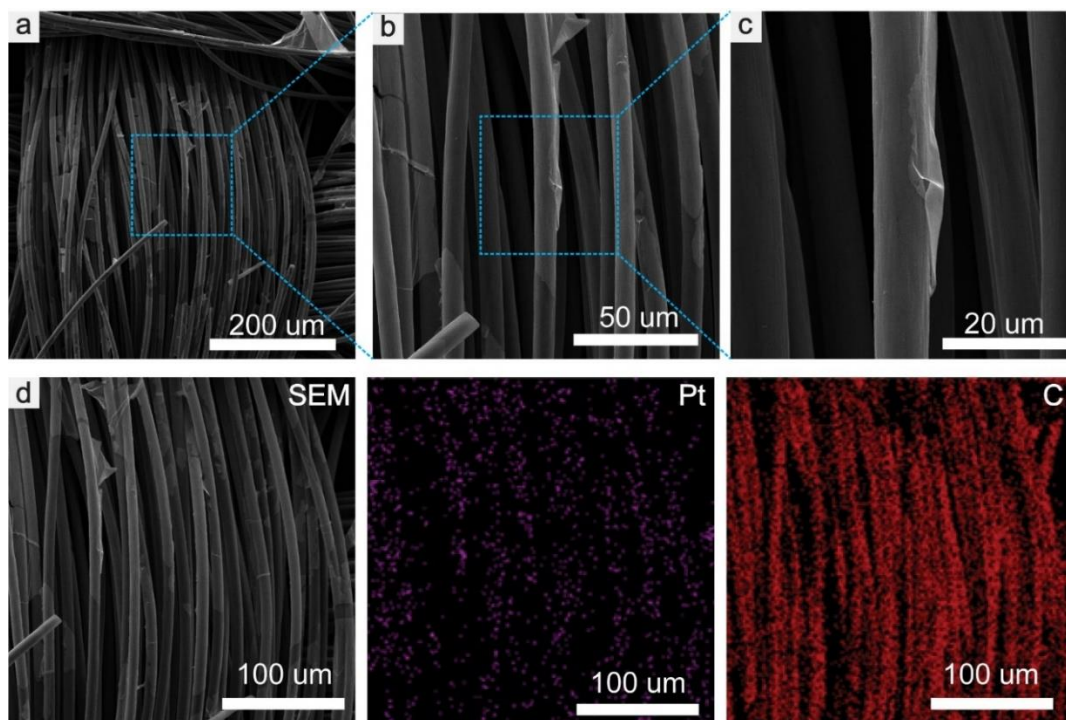

**Fig. S15** (a-c) SEM images of 19 nm Pt nanomembrane transferred to carbon clothes after 24 hours  $10 \text{ mA/cm}^2$  stability. (d) Energy Dispersive Spectroscopy (EDS) mapping of carbon clothes with 19 nm nanomembrane after stability tests

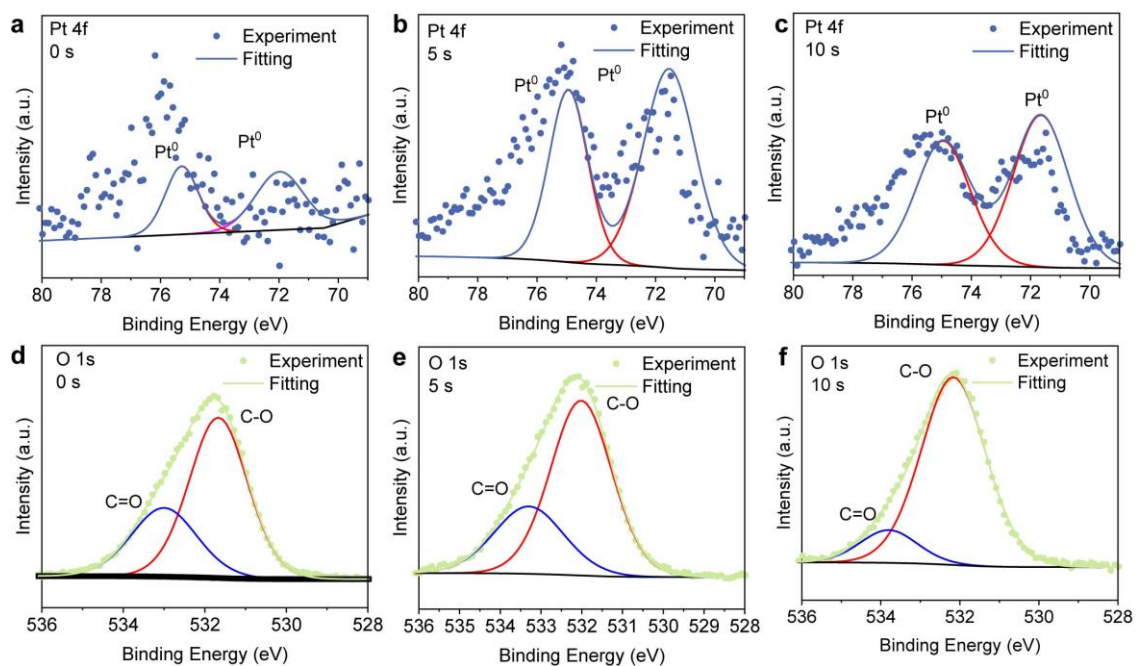

**Fig. S16** X-ray photoelectron spectroscopy (XPS) depth profile analysis of Pt nanomembrane after stability tests. Narrow-scan XPS spectra for (a-c) Pt 4f and (d-f) O 1s as a function of etching time

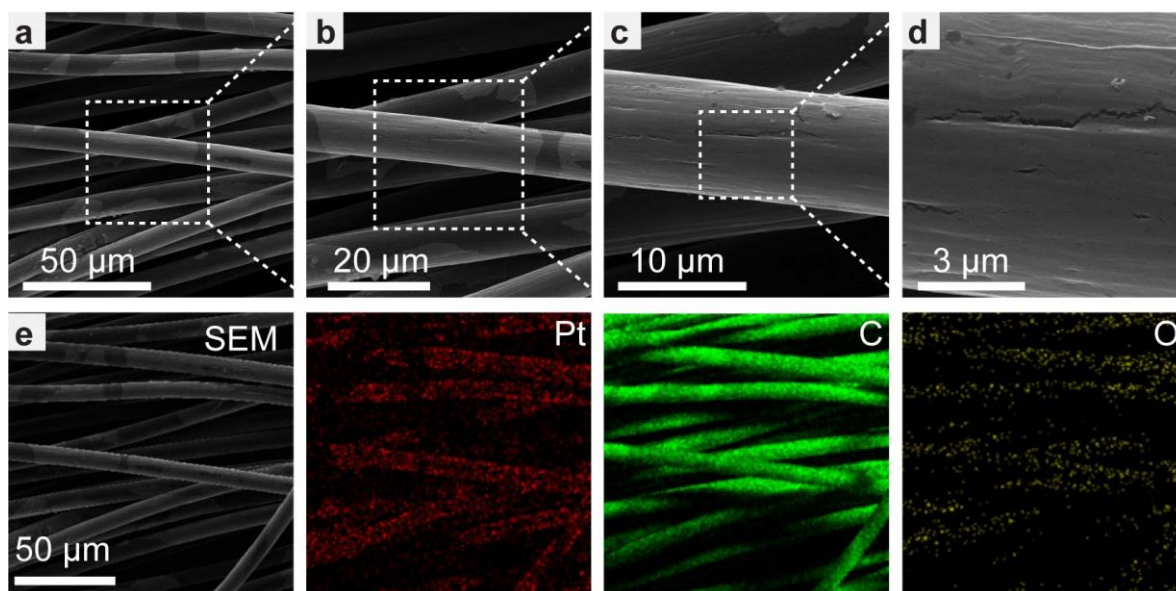

**Fig. S17** Carbon clothes after stability tests and ultrasonic oscillation, (a-d) SEM images (e) SEM-EDS mapping Pt, C and O

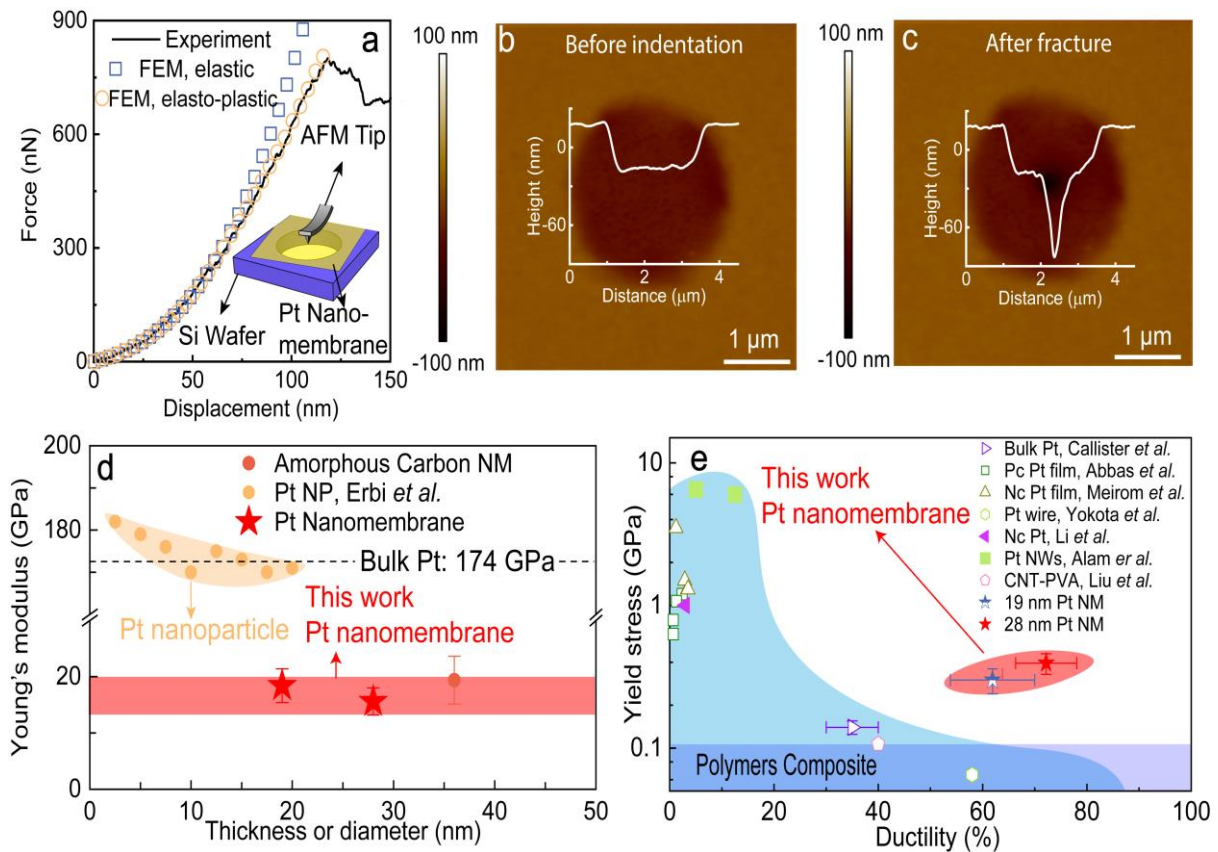

**Fig. S18** Mechanical behavior of the freestanding Pt nanomembrane. (a) The experimental force–displacement curve of a 19 nm-thick Pt nanomembrane under AFM indentation in comparison with the FEA simulations. (b) and (c) AFM scanning images of the suspended Pt nanomembrane before and after indentation. (d) Comparison of Young’s modulus of Pt nanomembrane, Pt nanoparticle (NP) [S1] and bulk Pt [S2]. (e) Comparison of the yield strength and ductility of Pt nanomembrane with those of nanocrystalline (NC) and polycrystalline (PC) Pt films, bulk Pt and Pt nanowires (NWs) [S3–S11]

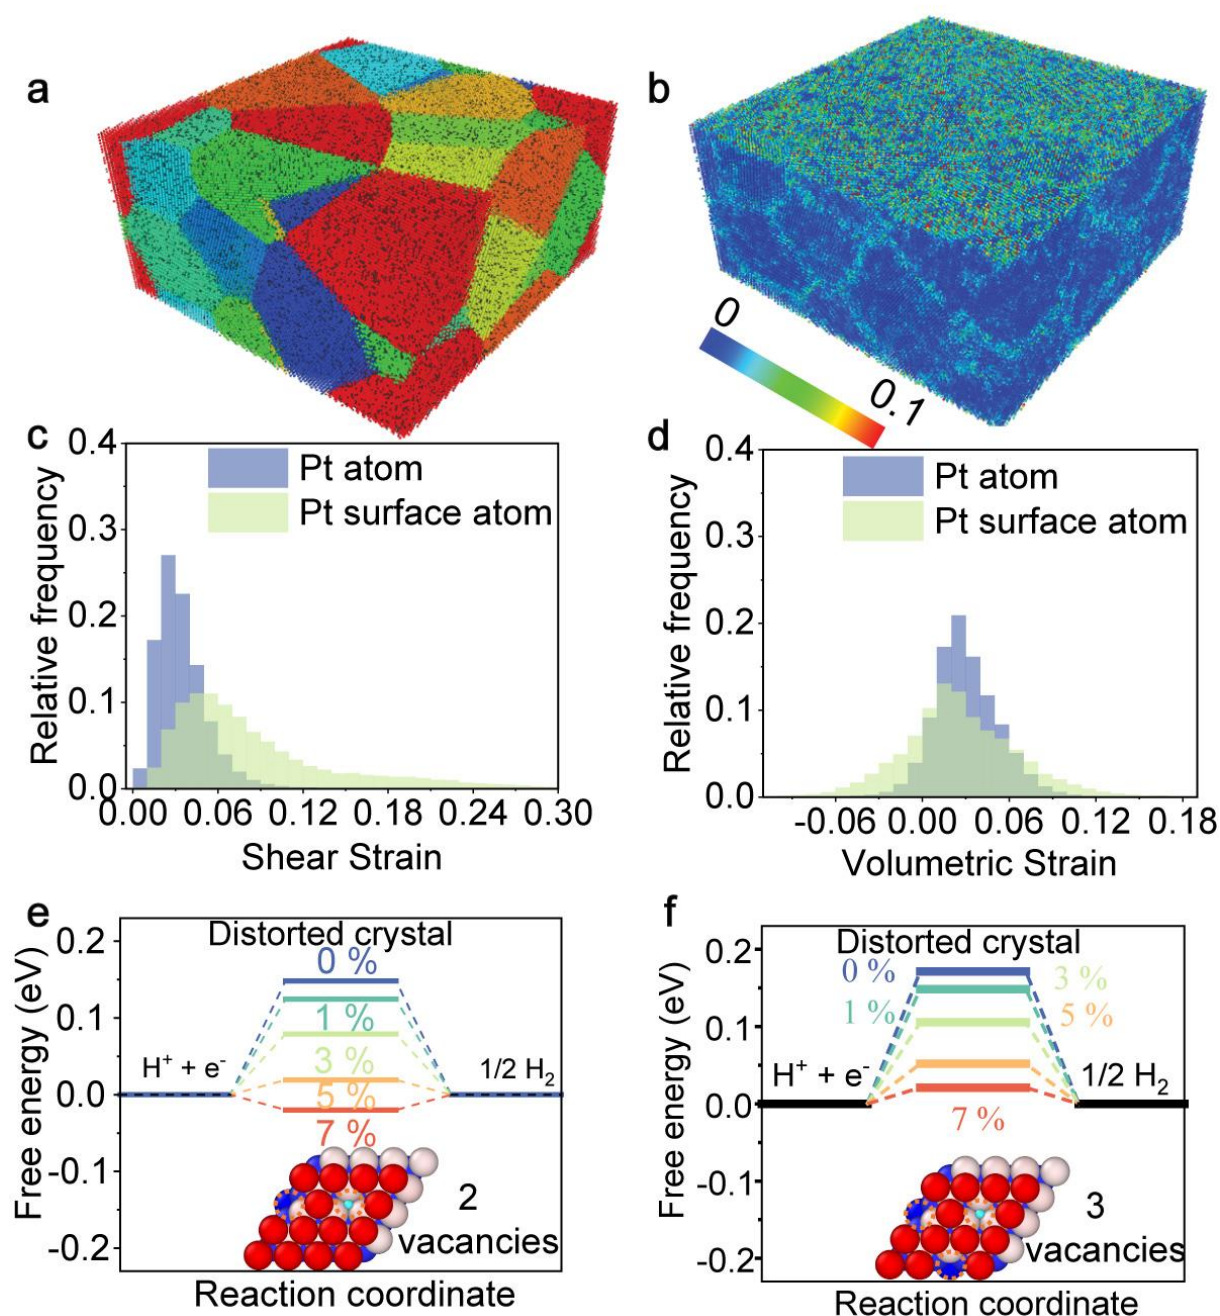

**Fig. S19** Simulation of lattice distortion induced by substitutional defects and adsorption energy of distorted crystal. **(a)** Atomic configurations of Pt nanocrystalline with substitutional C atoms. The grain index is indicated by rainbow color coding where C atoms are colored by black. **(b)** Distribution of local shear strain which reflected by color coding. **(c)-(d)** Distribution of Shear Strain **(c)**, Volumetric Strain **(d)** via Pt nanocrystalline with/without surface atoms, respectively. **(e)** Adsorption free energy versus the reaction coordinate of HER for a distorted crystal with 2 vacancies, with the heterogeneous tensile strain ranging from 0 to 7%. **(f)** Adsorption free energy versus the reaction coordinate of HER for a distorted crystal with 3 vacancies, with the heterogeneous tensile strain of 0–7%

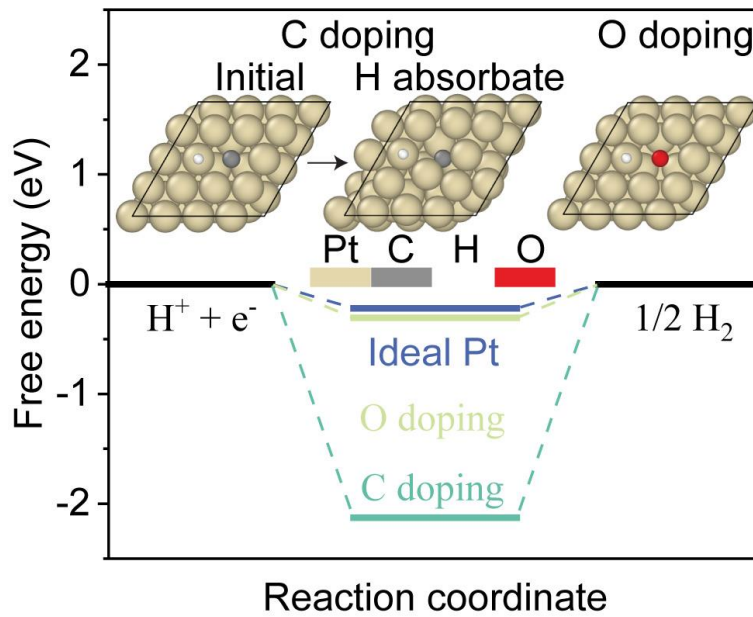

**Fig. S20** Simulation of substitutional defects C or O, and adsorption free energy of a non-distorted Pt nanocrystal

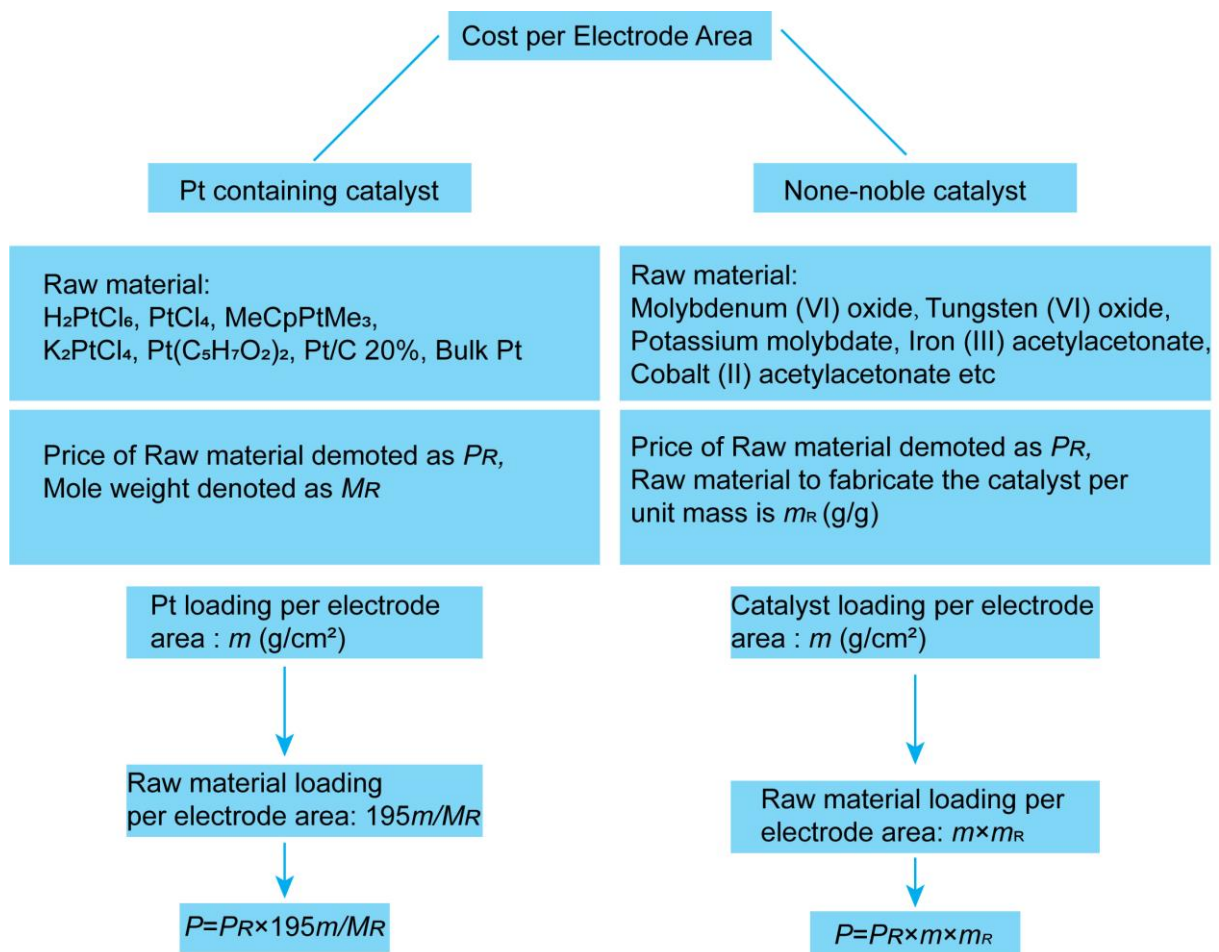

**Fig. S21** Diagram illustrating how cost per electrode area is calculated based on the price of raw materials

**Table S1** EXAFS fitting parameters at the Pt  $L_3$ -edge for Pt foil and Pt nanomembrane ( $S_0^2=0.839$ )

| Sample                       | Shell         | $CN^a$          | $R(\text{\AA})^b$  | $\sigma^2(\text{\AA}^2)^c$ | $\Delta E_0(\text{eV})^d$ | $R$ factor    |
|------------------------------|---------------|-----------------|--------------------|----------------------------|---------------------------|---------------|
| Pt foil                      | Pt-Pt         | 12*             | 2.762±0.001        | 0.0048±0.0001              | 7.4±0.4                   | 0.0017        |
| <b>19 nm Pt nanomembrane</b> | <b>Pt-C/O</b> | <b>1.2±0.2</b>  | <b>2.097±0.014</b> | <b>0.0092±0.0050</b>       | <b>9.4±4.8</b>            | <b>0.0074</b> |
|                              | <b>Pt-Pt</b>  | <b>9.8±0.3</b>  | <b>2.772±0.002</b> | <b>0.0061±0.0009</b>       | <b>9.5±0.8</b>            |               |
| <b>28 nm Pt nanomembrane</b> | <b>Pt-C/O</b> | <b>0.8±0.2</b>  | <b>2.101±0.023</b> | <b>0.0100±0.0026</b>       | <b>4.1±2.6</b>            | <b>0.0032</b> |
|                              | <b>Pt-Pt</b>  | <b>10.2±0.4</b> | <b>2.779±0.002</b> | <b>0.0052±0.0006</b>       | <b>10.6±0.5</b>           |               |

<sup>a</sup> $CN$ , coordination number; <sup>b</sup> $R$ , the distance to the neighboring atom; <sup>c</sup> $\sigma^2$ , the Mean Square Relative Displacement (MSRD); <sup>d</sup> $\Delta E_0$ , inner potential correction;  $R$  factor indicates the goodness of the fit.  $S_0^2$  was fixed to 0.839, according to the experimental EXAFS fit of Pt foil by fixing  $CN$  as the known crystallographic value. \* This value was fixed during EXAFS fitting, based on the known structure of Pt. Fitting range:  $3.0 \leq k (\text{\AA}^{-1}) \leq 13.8$  and  $1.0 \leq R (\text{\AA}) \leq 3.0$  (Pt foil);  $3.0 \leq k (\text{\AA}^{-1}) \leq 13.8$  and  $1.0 \leq R (\text{\AA}) \leq 3.5$  (19 nm Pt nanomembrane);  $3.0 \leq k (\text{\AA}^{-1}) \leq 13.8$  and  $1.0 \leq R (\text{\AA}) \leq 3.5$  (28 nm Pt nanomembrane). A reasonable range of EXAFS fitting parameters:  $0.700 < S_0^2 < 1.000$ ;  $CN > 0$ ;  $\sigma^2 > 0 \text{\AA}^2$ ;  $|\Delta E_0| < 10 \text{ eV}$ ;  $R$  factor  $< 0.02$ .

**Table S2** The comparison of HER performance of Pt nanomembrane with recently reported electrocatalysts in acid media

| Catalysts                      | Loading ( $\mu\text{g}/\text{cm}^2$ ) | $\eta_{10}$ (mV) | Tafel (mV/dec) | Mass activity at 50 mV ( $\text{A}/\text{mg}$ ) | Raw material              | References |
|--------------------------------|---------------------------------------|------------------|----------------|-------------------------------------------------|---------------------------|------------|
| Pt-GT-1                        | 1.4                                   | 18               | N/A            | 21.43                                           | $\text{H}_2\text{PtCl}_6$ | [S12]      |
| $\text{Pd}_{60}\text{Pt}_{40}$ | 13                                    | 130              | N/A            | 0.15                                            | $\text{PtCl}_4$           | [S13]      |
| Pt@DNA without binder          | 15                                    | 26               | 30             | 1.6                                             | $\text{H}_2\text{PtCl}_6$ | [S14]      |
| Pt@DNA with binder             | 15                                    | 210              | 241            | 0.09                                            | $\text{H}_2\text{PtCl}_6$ | [S14]      |
| Pt/CoP                         | 102                                   | 21               | 42.5           | 0.38                                            | $\text{H}_2\text{PtCl}_6$ | [S15]      |
| Pt-MoS <sub>2</sub>            | 27                                    | 51.5             | 40             | 0.34                                            | $\text{K}_2\text{PtCl}_4$ | [S16]      |
| Pt Sas/DG                      | 1000                                  | 23               | 25             | 0.07                                            | Pt net                    | [S17]      |
| Pt-TiS <sub>2</sub>            | 1.69                                  | 70               | 40.6           | 5.33                                            | $\text{K}_2\text{PtCl}_4$ | [S18]      |
| ALD100Pt/N                     | 6.1                                   | 44               | 29             | 10.1                                            | $\text{MeCpPtMe}_3$       | [S19]      |
| ALD50Pt/N                      | 1.61                                  | 38               | 29             | 2.12                                            | $\text{MeCpPtMe}_3$       | [S19]      |
| Pt-ALD FTO                     | 3.5                                   | 46.5             | N/A            | 4                                               | $\text{MeCpPtMe}_3$       | [S20]      |
| Pt1/graphene                   | 1.74                                  | 55               | 42             | 4.77                                            | $\text{MeCpPtMe}_3$       | [S21]      |
| Pt1/OLC                        | 1.35                                  | 38               | 36             | 17.02                                           | $\text{MeCpPtMe}_3$       | [S21]      |
| ALD Pt-WC                      | 0.55                                  | 438              | N/A            | N/A                                             | $\text{MeCpPtMe}_3$       | [S22]      |
| ALD Pt-WC                      | 3.1                                   | 408              | N/A            | N/A                                             | $\text{MeCpPtMe}_3$       | [S22]      |
| ALD Pt-WC                      | 5.5                                   | 306              | N/A            | N/A                                             | $\text{MeCpPtMe}_3$       | [S22]      |
| Pt@PCM                         | 200                                   | 105              | 65.3           | 0.16                                            | $\text{H}_2\text{PtCl}_6$ | [S23]      |
| PyPOP-Pt@G                     | 67                                    | 32               | 37             | 0.84                                            | $\text{H}_2\text{PtCl}_6$ | [S24]      |
| Pt1/MC                         | 10                                    | 25               | 30             | 5.75                                            | $\text{H}_2\text{PtCl}_6$ | [S25]      |



|                                                     |               |             |             |               |                                                                |                  |
|-----------------------------------------------------|---------------|-------------|-------------|---------------|----------------------------------------------------------------|------------------|
| Pt-MoS <sub>2</sub>                                 | 18            | 150         | 96          | 0.09          | H <sub>2</sub> PtCl <sub>6</sub>                               | [S26]            |
| Pt1/Fe-N-C                                          | 300           | 60          | 42          | 0.02          | H <sub>2</sub> PtCl <sub>6</sub>                               | [S27]            |
| Pt Cs/MoO <sub>2</sub>                              | 1.75          | 47          | 32.6        | 7.43          | H <sub>2</sub> PtCl <sub>6</sub>                               | [S28]            |
| Pt <sub>3</sub> Ni <sub>3</sub> NWS/C               | 15.3          | 31          | N/A         | N/A           | Pt(C <sub>5</sub> H <sub>7</sub> O <sub>2</sub> ) <sub>2</sub> | [S29]            |
| PdCuPt                                              | 41            | 22.8        | 25          | 3.0           | K <sub>2</sub> PtCl <sub>4</sub>                               | [S30]            |
| 40% Pt/C                                            | 640           | 63          | 32          | 0.013         | N/A                                                            | [S26]            |
| Pt/C                                                | 56.8          | 25.5        | N/A         | N/A           | N/A                                                            | [S12]            |
| Pt/C                                                | 33            | 52.5        | 31          | 0.27          | N/A                                                            | [S19]            |
| Pt/C                                                | 27            | 53          | 30          | 0.32          | N/A                                                            | [S16]            |
| Pt/C                                                | 80            | 14          | 32          | N/A           | N/A                                                            | [S31]            |
| Pt/C                                                | 67.8          | 35          | 31.2        | 0.28          | N/A                                                            | [S28]            |
| Pt/C                                                | 53            | 32          | 34.1        | 0.37          | N/A                                                            | [S32]            |
| Pt/C without binder                                 | 20            | 41          | 33          | 0.72          | N/A                                                            | [S14]            |
| Pt/C with binder                                    | 20            | 56          | 60          | 0.4           | N/A                                                            | [S14]            |
| Pt/C 20%                                            | 95.2          | 29          | 35          | 0.27          | N/A                                                            | [S21]            |
| Pt/C 5%                                             | 25.9          | 50          | 40          | 0.38          | N/A                                                            | [S21]            |
| Pt/C                                                | 59.4          | 15          | 21          | N/A           | N/A                                                            | [S33]            |
| Pt/C                                                | 36.1          | 30          | 31          | 0.83          | N/A                                                            | [S17]            |
| Pt/C                                                | 41.5          | 25          | 28          | 1.325         | N/A                                                            | [S30]            |
| MoN <sub>1.2</sub>                                  | 400           | 269         | 79          | N/A           | N/A                                                            | [S34]            |
| WN <sub>1.5</sub>                                   | 400           | 348         | 82          | N/A           | N/A                                                            | [S34]            |
| Mo <sub>0.7</sub> W <sub>0.3</sub> N <sub>1.2</sub> | 400           | 129         | 59          | N/A           | N/A                                                            | [S34]            |
| MoSe <sub>1.8</sub>                                 | 390           | 216         | 292         | N/A           | N/A                                                            | [S35]            |
| MoSe <sub>2.0</sub>                                 | 390           | 192         | 59          | N/A           | N/A                                                            | [S35]            |
| MoSe <sub>2.2</sub>                                 | 390           | 160         | 52          | N/A           | N/A                                                            | [S35]            |
| MoSe <sub>2.3</sub>                                 | 390           | 131         | 46          | N/A           | N/A                                                            | [S35]            |
| MoSe <sub>2.4</sub>                                 | 390           | 180         | 57          | N/A           | N/A                                                            | [S35]            |
| ReSe <sub>2</sub>                                   | 390           | 140         | 62          | N/A           | N/A                                                            | [S36]            |
| MnReSe <sub>2</sub>                                 | 390           | 140         | 62          | N/A           | N/A                                                            | [S36]            |
| FeReSe <sub>2</sub>                                 | 390           | 115         | 59          | N/A           | N/A                                                            | [S36]            |
| CoReSe <sub>2</sub>                                 | 390           | 100         | 56          | N/A           | N/A                                                            | [S36]            |
| NiReSe <sub>2</sub>                                 | 390           | 80          | 54          | N/A           | N/A                                                            | [S36]            |
| CuReSe <sub>2</sub>                                 | 390           | 130         | 58          | N/A           | N/A                                                            | [S36]            |
| <b>Pt foil</b>                                      | <b>321750</b> | <b>47.5</b> | <b>34.5</b> | <b>5.7E-5</b> | <b>Pure Pt</b>                                                 | <b>This work</b> |
| <b>5 nm Pt nanomembrane</b>                         | <b>5.22</b>   | <b>29</b>   | <b>36.7</b> | <b>4.43</b>   | <b>Pure Pt</b>                                                 | <b>This work</b> |
| <b>10 nm Pt nanomembrane</b>                        | <b>9.6</b>    | <b>26.5</b> | <b>29.2</b> | <b>2.67</b>   | <b>Pure Pt</b>                                                 | <b>This work</b> |
| <b>19 nm Pt nanomembrane</b>                        | <b>18.6</b>   | <b>27.5</b> | <b>29.7</b> | <b>1.38</b>   | <b>Pure Pt</b>                                                 | <b>This work</b> |

**Table S3** Summary of the TOF values and current densities at the overpotential of 100 mV between Our Pt nanomembrane and many other Pt-based catalysts in 0.5 M H<sub>2</sub>SO<sub>4</sub>

| Catalysts                              | Current density at 100 mV (mA/cm <sup>2</sup> ) | TOF 100mV(s <sup>-1</sup> ) | References       |
|----------------------------------------|-------------------------------------------------|-----------------------------|------------------|
| PtGa                                   | 500                                             | 17.1                        | [S37]            |
| Pt-Ru/CNT                              | 265                                             | 25.1                        | [S38]            |
| Pt1 SAC-VNGNMA                         | 88                                              | 4.0                         | [S39]            |
| Pt1/OLC                                | 56.5                                            | 40.8                        | [S21]            |
| Pt-SAs/WS <sub>2</sub>                 | 54                                              | 131.7                       | [S40]            |
| Pt <sub>2</sub> W/WO <sub>3</sub> /RGO | 44                                              | 2                           | [S41]            |
| Pt1/NMHCS                              | 40                                              | 4.5                         | [S42]            |
| PtRu@RFCS-6h                           | 32                                              | 4.0                         | [S43]            |
| Pt-SAs/MoS <sub>2</sub>                | 24                                              | 47.3                        | [S44]            |
| Pt@PCM                                 | 11                                              | 3.2                         | [S23]            |
| <b>5 nm Pt nanomembrane</b>            | <b>74.7</b>                                     | <b>145.7</b>                | <b>This Work</b> |
| <b>10 nm Pt nanomembrane</b>           | <b>83.8</b>                                     | <b>90.2</b>                 | <b>This Work</b> |
| <b>19 nm Pt nanomembrane</b>           | <b>89.7</b>                                     | <b>48.3</b>                 | <b>This Work</b> |

**Table S4** Price of raw materials for noble catalysts

| Raw material                                                   | Price per mass (\$/g) | Molecular Weight | Pt Price per mass (\$/μg) | References |
|----------------------------------------------------------------|-----------------------|------------------|---------------------------|------------|
| H <sub>2</sub> PtCl <sub>6</sub>                               | 270.71                | 409.81           | 0.13                      | [S45]      |
| PtCl <sub>4</sub>                                              | 178.00                | 336.89           | 0.10                      | [S46]      |
| MeCpPtMe <sub>3</sub>                                          | 475.76                | 319.30           | 0.29                      | [S47]      |
| K <sub>2</sub> PtCl <sub>4</sub>                               | 137.30                | 415.00           | 0.06                      | [S48]      |
| Pt(C <sub>3</sub> H <sub>7</sub> O <sub>2</sub> ) <sub>2</sub> | 229.40                | 393.29           | 0.11                      | [S49]      |
| Pt/C 20%                                                       | 152.00                | 195.00           | 7.60E-04                  | [S50]      |
| Bulk Pt                                                        | 33.86                 | 195.00           | 3.39E-05                  | [S51]      |

**Table S5** Price of raw material for non-noble catalysts

| Raw material                                          | Price per gram (\$/g) | References |
|-------------------------------------------------------|-----------------------|------------|
| Molybdenum (VI) oxide                                 | 2.87                  | [S52]      |
| Tungsten (VI) oxide                                   | 15.48                 | [S53]      |
| Potassium molybdate                                   | 0.94                  | [S54]      |
| Ammonium perrhenate                                   | 22.68                 | [S55]      |
| Selenium                                              | 9.59                  | [S56]      |
| Dibenzyl diselenide, 95%, Thermo Scientific Chemicals | 21.50                 | [S57]      |
| Manganese (III) acetylacetonate                       | 2.32                  | [S58]      |
| Iron (III) acetylacetonate                            | 0.11                  | [S59]      |
| Cobalt (II) acetylacetonate                           | 1.85                  | [S60]      |
| Nickel (II) acetylacetonate                           | 9.20                  | [S61]      |
| Copper (II) acetylacetonate                           | 4.70                  | [S62]      |

## Supplementary References

- [S1] M. Erbi, H. Amara, R. Gatti, Tuning elastic properties of metallic nanoparticles by shape controlling: from atomistic to continuous models.: arXiv: 2303.06995. (2023).
- [S2] K.N. Jonnalagadda, I. Chasiotis, S. Yagnamurthy, J. Lambros, J. Pulskamp et al., Experimental investigation of strain rate dependence of nanocrystalline Pt films. *Exp. Mech.* **50**, 25–35 (2010). <https://doi.org/10.1007/s11340-008-9212-7>

- [S3] R.A. Meirom, T.E. Clark, C.L. Muhlstein, The effects of texture and grain morphology on the fracture toughness and fatigue crack growth resistance of nanocrystalline platinum films. *Int. J. Fatigue* **70**, 258–269 (2015). <https://doi.org/10.1016/j.ijfatigue.2014.09.017>
- [S4] R.A. Meirom, D.H. Alsem, A.L. Romasco, T. Clark, R.G. Polcawich et al., Fatigue-induced grain coarsening in nanocrystalline platinum films. *Acta Mater.* **59**, 1141–1149 (2011). <https://doi.org/10.1016/j.actamat.2010.10.047>
- [S5] R.A. Meirom, T.E. Clark, C.L. Muhlstein, The role of specimen thickness in the fracture toughness and fatigue crack growth resistance of nanocrystalline platinum films. *Acta Mater.* **60**, 1408–1417 (2012). <https://doi.org/10.1016/j.actamat.2011.11.015>
- [S6] K. Abbas, S. Alaie, M. Ghasemi Baboly, M.M. Elahi, D.H. Anjum et al., Nanoscale size effects on the mechanical properties of platinum thin films and cross-sectional grain morphology. *J. Micromech. Microeng.* **26**, 015007 (2016). <https://doi.org/10.1088/0960-1317/26/1/015007>
- [S7] M.F. Alam, M.R. Bin Shahadat, Temperature and strain rate dependent mechanical properties of ultrathin metallic nanowires: A molecular dynamics study. *AIP Conf. Proc.* **1980**, 030015 (2018) <https://doi.org/10.1063/1.5044294>
- [S8] J. Li, B. Lu, H. Zhou, C. Tian, Y. Xian et al., Molecular dynamics simulation of mechanical properties of nanocrystalline platinum: grain-size and temperature effects. *Phys. Lett. A* **383**, 1922–1928 (2019). <https://doi.org/10.1016/j.physleta.2018.10.053>
- [S9] Y. Yokota, T. Nihei, M. Yoshino, A. Yamaji, S. Toyoda et al., Microstructure and mechanical properties of platinum fiber fabricated by unidirectional solidification. *Crystals* **10**, 216 (2020). <https://doi.org/10.3390/cryst10030216>
- [S10] W. D. Callister Jr and D. G. Rethwisch, *Fundamentals of materials science and engineering: an integrated approach*. *Fundamentals of Materials Science and Engineering: An Integrated Approach* (John Wiley & Sons, 2020)
- [S11] L. Liu, A.H. Barber, S. Nuriel, H.D. Wagner, Mechanical properties of functionalized single-walled carbon-nanotube/poly(vinyl alcohol) nanocomposites. *Adv. Funct. Mater.* **15**, 975–980 (2005). <https://doi.org/10.1002/adfm.200400525>
- [S12] J.N. Tiwari, S. Sultan, C.W. Myung, T. Yoon, N. Li et al., Multicomponent electrocatalyst with ultralow Pt loading and high hydrogen evolution activity. *Nat. Energy* **3**, 773–782 (2018). <https://doi.org/10.1038/s41560-018-0209-x>
- [S13] R. Ojani, J.B. Raoof, E. Hasheminejad, One-step electroless deposition of Pd/Pt bimetallic microstructures by galvanic replacement on copper substrate and investigation of its performance for the hydrogen evolution reaction. *Int. J. Hydrog. Energy* **38**, 92–99 (2013). <https://doi.org/10.1016/j.ijhydene.2012.10.015>
- [S14] S. Anantharaj, P.E. Karthik, B. Subramanian, S. Kundu, Pt nanoparticle anchored molecular self-assemblies of DNA: an extremely stable and efficient HER electrocatalyst with ultralow Pt content. *ACS Catal.* **6**, 4660–4672 (2016). <https://doi.org/10.1021/acscatal.6b00965>
- [S15] J. Li, H.-X. Liu, W. Gou, M. Zhang, Z. Xia et al., Ethylene-glycol ligand environment facilitates highly efficient hydrogen evolution of Pt/CoP through proton concentration and hydrogen spillover. *Energy Environ. Sci.* **12**, 2298–2304 (2019). <https://doi.org/10.1039/C9EE00752K>
- [S16] X. Huang, Z. Zeng, S. Bao, M. Wang, X. Qi et al., Solution-phase epitaxial growth of noble metal nanostructures on dispersible single-layer molybdenum disulfide nanosheets. *Nat. Commun.* **4**, 1444 (2013). <https://doi.org/10.1038/ncomms2472>

- [S17] Y. Qu, B. Chen, Z. Li, X. Duan, L. Wang et al., Thermal emitting strategy to synthesize atomically dispersed Pt metal sites from bulk Pt metal. *J. Am. Chem. Soc.* **141**, 4505–4509 (2019). <https://doi.org/10.1021/jacs.8b09834>
- [S18] Z. Zeng, C. Tan, X. Huang, S. Bao, H. Zhang, Growth of noble metal nanoparticles on single-layer TiS<sub>2</sub> and TaS<sub>2</sub> nanosheets for hydrogen evolution reaction. *Energy Environ. Sci.* **7**, 797–803 (2014). <https://doi.org/10.1039/c3ee42620c>
- [S19] N. Cheng, S. Stambula, D. Wang, M.N. Banis, J. Liu et al., Platinum single-atom and cluster catalysis of the hydrogen evolution reaction. *Nat. Commun.* **7**, 13638 (2016). <https://doi.org/10.1038/ncomms13638>
- [S20] J. Dendooven, R.K. Ramachandran, E. Solano, M. Kurttepe, L. Geerts et al., Independent tuning of size and coverage of supported Pt nanoparticles using atomic layer deposition. *Nat. Commun.* **8**, 1074 (2017). <https://doi.org/10.1038/s41467-017-01140-z>
- [S21] D. Liu, X. Li, S. Chen, H. Yan, C. Wang et al., Atomically dispersed platinum supported on curved carbon supports for efficient electrocatalytic hydrogen evolution. *Nat. Energy* **4**, 512–518 (2019). <https://doi.org/10.1038/s41560-019-0402-6>
- [S22] I.J. Hsu, Y.C. Kimmel, X. Jiang, B.G. Willis, J.G. Chen, Atomic layer deposition synthesis of platinum–tungsten carbide core–shell catalysts for the hydrogen evolution reaction. *Chem. Commun.* **48**, 1063–1065 (2012). <https://doi.org/10.1039/C1CC15812K>
- [S23] H. Zhang, P. An, W. Zhou, B.Y. Guan, P. Zhang et al., Dynamic traction of lattice-confined platinum atoms into mesoporous carbon matrix for hydrogen evolution reaction. *Sci. Adv.* **4**, eaao6657 (2018). <https://doi.org/10.1126/sciadv.aao6657>
- [S24] A.B. Soliman, M.H. Hassan, T.N. Huan, A.A. Abugable, W.A. Elmehalmey et al., Pt immobilization within a tailored porous-organic polymer–graphene composite: opportunities in the hydrogen evolving reaction. *ACS Catal.* **7**, 7847–7854 (2017). <https://doi.org/10.1021/acscatal.7b02246>
- [S25] H. Wei, K. Huang, D. Wang, R. Zhang, B. Ge et al., Iced photochemical reduction to synthesize atomically dispersed metals by suppressing nanocrystal growth. *Nat. Commun.* **8**, 1490 (2017). <https://doi.org/10.1038/s41467-017-01521-4>
- [S26] J. Deng, H. Li, J. Xiao, Y. Tu, D. Deng et al., Triggering the electrocatalytic hydrogen evolution activity of the inert two-dimensional MoS<sub>2</sub> surface *via* single-atom metal doping. *Energy Environ. Sci.* **8**, 1594–1601 (2015). <https://doi.org/10.1039/C5EE00751H>
- [S27] X. Zeng, J. Shui, X. Liu, Q. Liu, Y. Li et al., Single-atom to single-atom grafting of Pt<sub>1</sub> onto Fe N<sub>4</sub> center: Pt<sub>1</sub>@Fe-N-C multifunctional electrocatalyst with significantly enhanced properties. *Adv. Energy Mater.* **8**, 1701345 (2018). <https://doi.org/10.1002/aenm.201701345>
- [S28] X. Li, J. Yu, J. Jia, A. Wang, L. Zhao et al., Confined distribution of platinum clusters on MoO<sub>2</sub> hexagonal nanosheets with oxygen vacancies as a high-efficiency electrocatalyst for hydrogen evolution reaction. *Nano Energy* **62**, 127–135 (2019). <https://doi.org/10.1016/j.nanoen.2019.05.013>
- [S29] P. Wang, X. Zhang, J. Zhang, S. Wan, S. Guo et al., Precise tuning in platinum–nickel/nickel sulfide interface nanowires for synergistic hydrogen evolution catalysis. *Nat. Commun.* **8**, 14580 (2017). <https://doi.org/10.1038/ncomms14580>
- [S30] T. Chao, X. Luo, W. Chen, B. Jiang, J. Ge et al., Atomically dispersed copper–platinum dual sites alloyed with palladium nanorings catalyze the hydrogen evolution reaction. *Angew. Chem. Int. Ed Engl.* **56**, 16047–16051 (2017). <https://doi.org/10.1002/anie.201709803>

- [S31] H. Jin, S. Sultan, M. Ha, J.N. Tiwari, M.G. Kim et al., Simple and scalable mechanochemical synthesis of noble metal catalysts with single atoms toward highly efficient hydrogen evolution. *Adv. Funct. Mater.* **30**, 2000531 (2020). <https://doi.org/10.1002/adfm.202000531>
- [S32] B. Lin, Y. Zhang, H. Zhang, H. Wu, J. Shao et al., Centimeter-scale two-dimensional metallenes for high-efficiency electrocatalysis and sensing. *ACS Mater. Lett.* **5**, 397–405 (2023). <https://doi.org/10.1021/acsmaterialslett.2c01066>
- [S33] H. Jin, M. Ha, M.G. Kim, J.H. Lee, K.S. Kim, Engineering Pt coordination environment with atomically dispersed transition metal sites toward superior hydrogen evolution. *Adv. Energy Mater.* **13**, 2204213 (2023). <https://doi.org/10.1002/aenm.202204213>
- [S34] H. Jin, Q. Gu, B. Chen, C. Tang, Y. Zheng et al., Molten salt-directed catalytic synthesis of 2D layered transition-metal nitrides for efficient hydrogen evolution. *Chem* **6**, 2382–2394 (2020). <https://doi.org/10.1016/j.chempr.2020.06.037>
- [S35] I.S. Kwon, I.H. Kwak, T.T. Debela, H.G. Abbas, Y.C. Park et al., Se-rich MoSe<sub>2</sub> nanosheets and their superior electrocatalytic performance for hydrogen evolution reaction. *ACS Nano* **14**, 6295–6304 (2020). <https://doi.org/10.1021/acsnano.0c02593>
- [S36] I.S. Kwon, I.H. Kwak, S. Ju, S. Kang, S. Han et al., Adatom doping of transition metals in ReSe<sub>2</sub> nanosheets for enhanced electrocatalytic hydrogen evolution reaction. *ACS Nano* **14**, 12184–12194 (2020). <https://doi.org/10.1021/acsnano.0c05874>
- [S37] Q. Yang, G. Li, K. Manna, F. Fan, C. Felser et al., Topological engineering of Pt-group-metal-based chiral crystals toward high-efficiency hydrogen evolution catalysts. *Adv. Mater.* **32**, e1908518 (2020). <https://doi.org/10.1002/adma.201908518>
- [S38] D. Zhang, Z. Wang, X. Wu, Y. Shi, N. Nie et al., Noble metal (Pt, Rh, Pd, Ir) doped Ru/CNT ultra-small alloy for acidic hydrogen evolution at high current density. *Small* **18**, e2104559 (2022). <https://doi.org/10.1002/smll.202104559>
- [S39] K. Chi, Z. Chen, F. Xiao, W. Guo, W. Xi et al., Maximizing the utility of single atom electrocatalysts on a 3D graphene nanomesh. *J. Mater. Chem. A* **7**, 15575–15579 (2019). <https://doi.org/10.1039/C9TA00942F>
- [S40] Y. Shi, Z.-R. Ma, Y.-Y. Xiao, Y.-C. Yin, W.-M. Huang et al., Electronic metal-support interaction modulates single-atom platinum catalysis for hydrogen evolution reaction. *Nat. Commun.* **12**, 3021 (2021). <https://doi.org/10.1038/s41467-021-23306-6>
- [S41] Y.-W. Peng, C. Shan, H.-J. Wang, L. Hong, S. Yao et al., Polyoxometalate-derived ultrasmall Pt<sub>2</sub>W/WO<sub>3</sub> heterostructure outperforms platinum for large-current-density H<sub>2</sub> evolution. *Adv. Energy Mater.* **9**, 1–9 (2019). <https://doi.org/10.1002/aenm.201900597>
- [S42] P. Kuang, Y. Wang, B. Zhu, F. Xia, C.W. Tung et al., Pt single atoms supported on N-doped mesoporous hollow carbon spheres with enhanced electrocatalytic H<sub>2</sub>-evolution activity. *Adv. Mater.* **33**, e2008599 (2021). <https://doi.org/10.1002/adma.202008599>
- [S43] K. Li, Y. Li, Y. Wang, J. Ge, C. Liu et al., Enhanced electrocatalytic performance for the hydrogen evolution reaction through surface enrichment of platinum nanoclusters alloying with ruthenium *in situ* embedded in carbon. *Energy Environ. Sci.* **11**, 1232–1239 (2018). <https://doi.org/10.1039/C8EE00402A>
- [S44] Y. Shi, W.-M. Huang, J. Li, Y. Zhou, Z.-Q. Li et al., Site-specific electrodeposition enables self-terminating growth of atomically dispersed metal catalysts. *Nat. Commun.* **11**, 4558 (2020). <https://doi.org/10.1038/s41467-020-18430-8>
- [S45] Merck, Chloroplatinic acid solution. (2023). <https://www.sigmaaldrich.com/HK/en/product/aldrich/262587?gclid=Cj0KCCQjwk7ugB>

[hDIARIsAGuvGpYmy\\_nhnnZ3hdrqGp9ehvTpe0HVD8i2vMSK-0ZbjpV-XtvL-MRawM4aAmE5EALw\\_wcB](#)

- [S46] Merck, Platinum(IV) chloride. (2023).  
<https://www.sigmaaldrich.com/HK/en/product/aldrich/206113>
- [S47] Merck, Trimethyl(methylcyclopentadienyl)platinum(IV). (2023).  
<https://www.sigmaaldrich.com/HK/en/product/aldrich/645605>
- [S48] Merck, Potassium tetrachloroplatinate(II). (2023).  
[https://www.sigmaaldrich.com/HK/en/product/aldrich/206075?gclid=Cj0KCQjwk7ugBhDIARIsAGuvGpZDGlxPjYs31bM2dkrOnXMxY-Kc6h2-yl5HusYx2B3j69T0RT01nRUaAn9JEALw\\_wcB](https://www.sigmaaldrich.com/HK/en/product/aldrich/206075?gclid=Cj0KCQjwk7ugBhDIARIsAGuvGpZDGlxPjYs31bM2dkrOnXMxY-Kc6h2-yl5HusYx2B3j69T0RT01nRUaAn9JEALw_wcB)
- [S49] Merck, Platinum(II) acetylacetonate. (2023).  
[https://www.sigmaaldrich.com/HK/zh/product/aldrich/282782?gclid=Cj0KCQjwk7ugBhDIARIsAGuvGpZWez6vbLp2ImVg1mPPAjXtHJjwqMIhYvh3WxQLgrPsJ5oKi1d3JgUaAgUiEALw\\_wcB](https://www.sigmaaldrich.com/HK/zh/product/aldrich/282782?gclid=Cj0KCQjwk7ugBhDIARIsAGuvGpZWez6vbLp2ImVg1mPPAjXtHJjwqMIhYvh3WxQLgrPsJ5oKi1d3JgUaAgUiEALw_wcB)
- [S50] Merck, Platinum on graphitized carbon. (2023).  
<https://www.sigmaaldrich.com/HK/en/product/aldrich/738549>
- [S51] the New York Mercantile Exchange, Pt. (2023). <https://www.cbcie.com/pt/index.html>
- [S52] Merck, Molybdenum(VI) oxide. (2023).  
<https://www.sigmaaldrich.com/HK/en/search/moo3?focus=products&page=1&perpage=30&sort=relevance&term=moo3&type=product>
- [S53] Merck, Tungsten(VI) oxide. (2023).  
[https://www.sigmaaldrich.com/HK/en/search/wo3?focus=products&page=1&perpage=30&sort=relevance&term=wo3&type=product\\_name](https://www.sigmaaldrich.com/HK/en/search/wo3?focus=products&page=1&perpage=30&sort=relevance&term=wo3&type=product_name)
- [S54] Merck, Potassium molybdate. (2023).  
<https://www.sigmaaldrich.com/HK/en/search/k2moo4?focus=products&page=1&perpage=30&sort=relevance&term=k2moo4&type=product>
- [S55] Merck, Ammonium perrhenate. (2023).  
<https://www.sigmaaldrich.com/HK/en/substance/ammoniumperrhenate2682413598657>
- [S56] Merck, Selenium. (2023).  
<https://www.sigmaaldrich.com/HK/en/search/se?focus=products&page=1&perpage=30&sort=relevance&term=se&type=product>
- [S57] F. Scientific, Dibenzyl diselenide, 95%, Thermo Scientific Chemicals. (2023).
- [S58] Merck, Manganese(III) acetylacetonate. (2023).  
<https://www.sigmaaldrich.com/HK/en/product/aldrich/m2284>
- [S59] Merck, Iron(III) acetylacetonate. (2023).  
<https://www.sigmaaldrich.com/HK/en/substance/ironiiiacylacetonate3531714024181>
- [S60] Merck, Cobalt(II) acetylacetonate. (2023).  
<https://www.sigmaaldrich.com/HK/en/substance/cobaltiiacylacetonate2571514024487>
- [S61] Merck, Nickel(II) acetylacetonate. (2023).  
[https://www.sigmaaldrich.com/HK/en/search/ni\(c5h7o2\)2?focus=products&page=1&perpage=30&sort=relevance&term=ni%28c5h7o2%292&type=product](https://www.sigmaaldrich.com/HK/en/search/ni(c5h7o2)2?focus=products&page=1&perpage=30&sort=relevance&term=ni%28c5h7o2%292&type=product)
- [S62] Merck, Copper(II) acetylacetonate. (2023).  
<https://www.sigmaaldrich.com/HK/en/substance/copperiiacylacetonate2617613395169>
